# Supplementary material for: Altered DNA methylation in liver and adipose tissues derived from individuals with obesity and type 2 diabetes
Source: Springer Nature journal article supplement (doi:10.1186/s12881-018-0542-8), 2018-02-21
Supplement: MOESM1 [file 15481152]

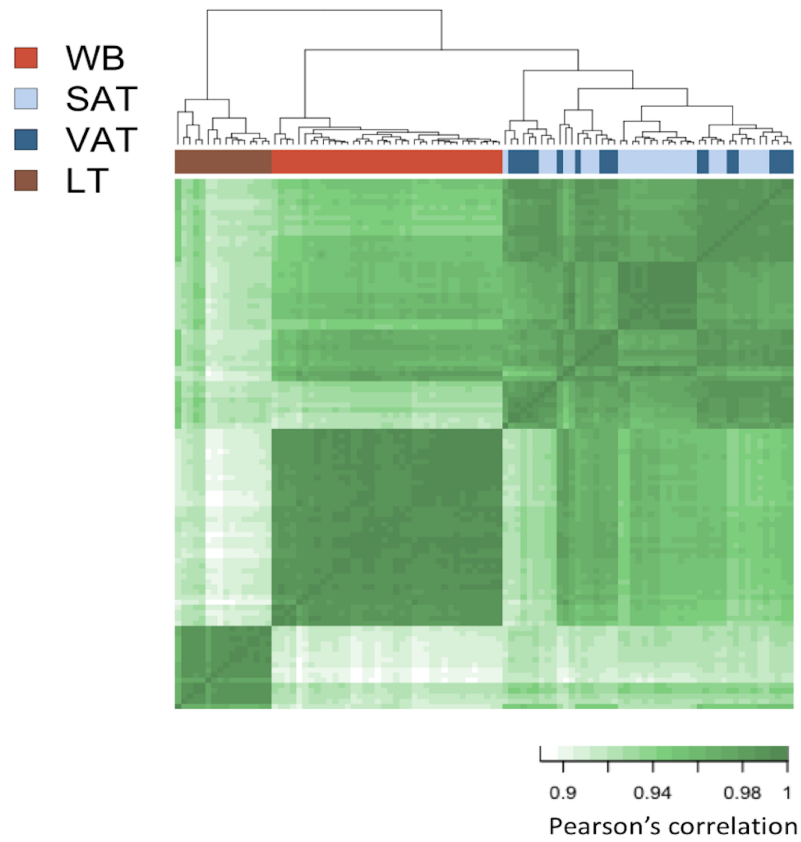

**Figure S1. Clustering of methylation data from tissue samples from individuals with obesity.** Pearson's correlation coefficient-based heat-map representation of methylation status of autosomal CpG sites among different tissues.

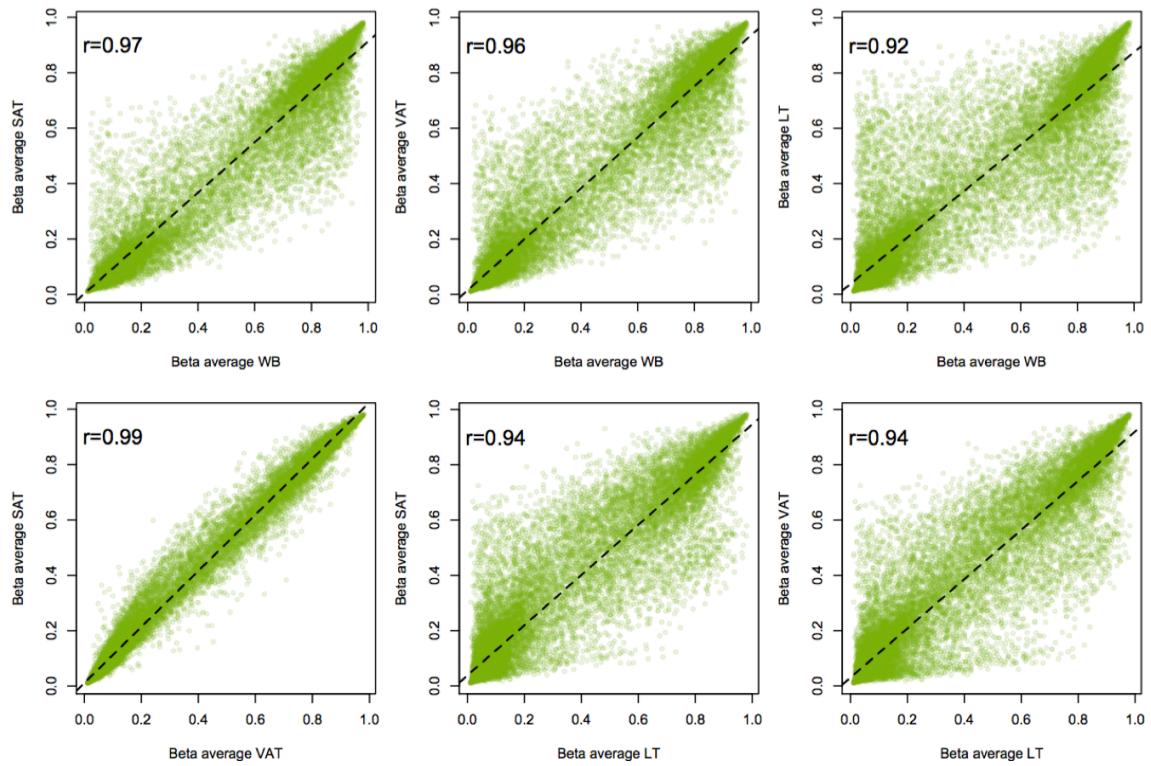

**Figure S2. Comparison of methylation averages among tissue types.** Scatter plots of comparison of DNA methylation levels between different tissue samples. Pearson's  $r$  values are denoted in the top left corner.

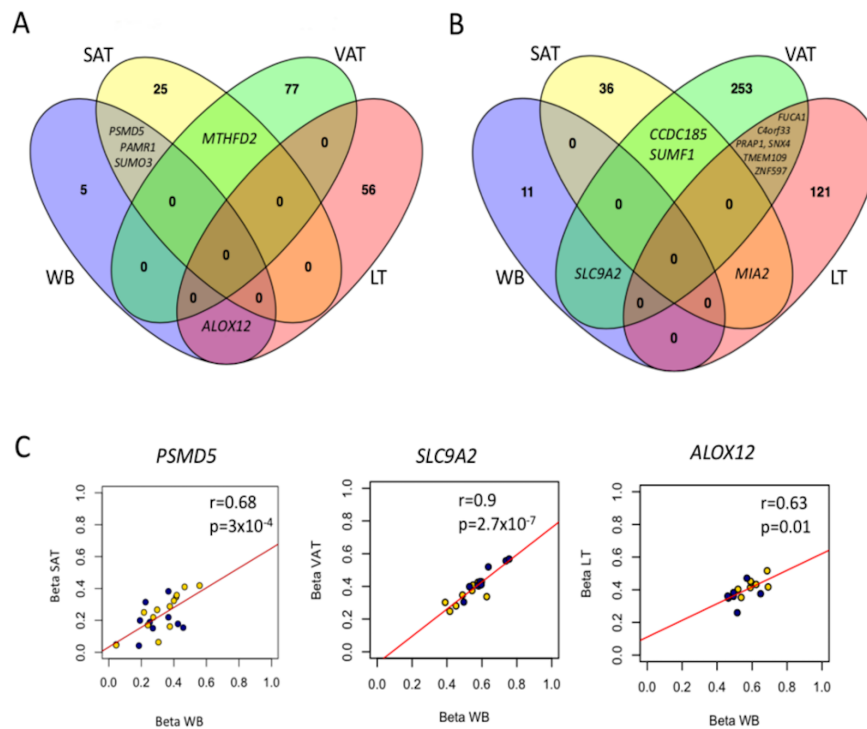

**Figure S3. Comparison of DMCs between different tissues. (A)** Venn diagram of positive DMCs. **(B)** Venn diagram of negative DMCs from WB. **(C)** Sites with correlation between WB and other tissues: *ALOX12* (cg03760483), *PSMD5* (cg09419670), and *SLC9A2* (cg20050113).

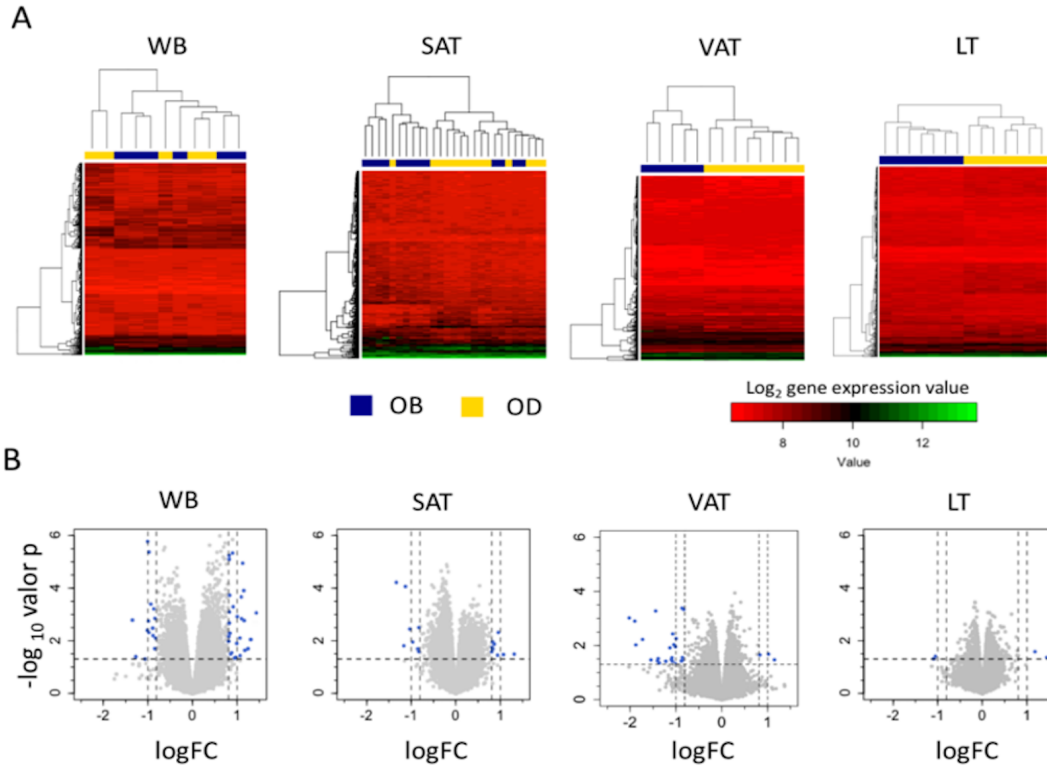

**Figure S4. Differential gene expression. (A)** Hierarchical clustering analysis of the top 500 identified probes that were differentially expressed between DO and NDO across tissues. The color bars at the top of the heat map indicate the patient status: yellow for DO, and blue for NDO. **(B)** Volcano plot of the log odds of differential expression vs. the log fold-change in gene expression between DO and NDO patients in WB, SAT, VAT, and LT. Probes with a  $|\text{fold-change}| > 0.8$  and  $p < 0.05$  are highlighted in blue.

**Table S1. List of DMCs in WB in the comparison between the DO and NDO groups**

| Target ID  | Symbol           | CHR | CPG Island | Beta DO | Beta OB | Delta Beta | p-value |
|------------|------------------|-----|------------|---------|---------|------------|---------|
| cg13105904 | <i>KHNYN</i>     | 14  | TRUE       | 0.22    | 0.12    | 0.1        | 0.009   |
| cg09419670 | <i>PSMD5*</i>    | 9   | TRUE       | 0.37    | 0.28    | 0.09       | 0.008   |
| cg21717724 | <i>PSMD5</i>     | 9   | TRUE       | 0.78    | 0.7     | 0.08       | 0.049   |
| cg03760483 | <i>ALOX12</i>    | 17  | TRUE       | 0.52    | 0.45    | 0.07       | 0.003   |
| cg21053323 | <i>SUMO3</i>     | 21  | TRUE       | 0.33    | 0.26    | 0.06       | 0.001   |
| cg06873352 | <i>STRADA</i>    | 17  | TRUE       | 0.24    | 0.18    | 0.06       | 0.010   |
| cg19728382 | <i>STC2</i>      | 5   | TRUE       | 0.58    | 0.53    | 0.05       | 0.009   |
| cg19592945 | <i>P2RXL1</i>    | 22  | FALSE      | 0.48    | 0.43    | 0.05       | 0.033   |
| cg14642338 | <i>PAMR1</i>     | 11  | FALSE      | 0.56    | 0.51    | 0.05       | 0.044   |
| cg20050113 | <i>SLC9A2</i>    | 2   | TRUE       | 0.55    | 0.6     | -0.05      | 0.048   |
| cg06906435 | <i>C14orf177</i> | 14  | FALSE      | 0.53    | 0.59    | -0.05      | 0.039   |
| cg02588309 | <i>TTC33</i>     | 5   | TRUE       | 0.34    | 0.39    | -0.05      | 0.010   |
| cg22686523 | <i>FLJ25006</i>  | 17  | FALSE      | 0.6     | 0.66    | -0.06      | 0.048   |
| cg13982505 | <i>KCNJ13*</i>   | 2   | FALSE      | 0.69    | 0.75    | -0.06      | 0.019   |
| cg13033054 | <i>LINC00846</i> | 21  | FALSE      | 0.57    | 0.64    | -0.06      | 0.026   |
| cg23439277 | <i>PLCE1*</i>    | 10  | FALSE      | 0.63    | 0.69    | -0.06      | 0.009   |
| cg25853078 | <i>OPCML*</i>    | 11  | FALSE      | 0.47    | 0.54    | -0.06      | 0.003   |
| cg13383491 | <i>GPR85*</i>    | 7   | FALSE      | 0.47    | 0.55    | -0.08      | 0.001   |
| cg06771126 | <i>HOP*</i>      | 4   | FALSE      | 0.3     | 0.38    | -0.08      | 0.012   |
| cg25997474 | <i>ADH1C*</i>    | 4   | FALSE      | 0.58    | 0.66    | -0.08      | 0.007   |
| cg03606258 | <i>GNAS</i>      | 20  | TRUE       | 0.5     | 0.6     | -0.1       | 0.038   |

\*significant DMCs after adjusted by cell-type heterogeneity

**Table S2. List of DMCs in SAT in the comparison between the DO and NDO groups**

| Target ID  | Symbol        | CHR | CPG Island | Beta DO | Beta OB | Delta Beta | p-value |
|------------|---------------|-----|------------|---------|---------|------------|---------|
| cg17687883 | <i>MTHFD2</i> | 2   | TRUE       | 0.2     | 0.07    | 0.14       | 0.011   |
| cg09405083 | <i>WBP1L</i>  | 10  | FALSE      | 0.31    | 0.19    | 0.12       | 0.024   |
| cg09419670 | <i>PSMD5</i>  | 9   | TRUE       | 0.27    | 0.19    | 0.08       | 0.024   |
| cg14144305 | <i>ALX4</i>   | 11  | TRUE       | 0.34    | 0.26    | 0.08       | 0.007   |
| cg04317399 | <i>HOXA4</i>  | 7   | TRUE       | 0.34    | 0.27    | 0.08       | 0.018   |
| cg14642338 | <i>PAMR1</i>  | 11  | FALSE      | 0.47    | 0.4     | 0.07       | 0.006   |
| cg00983520 | <i>CPT1B</i>  | 22  | TRUE       | 0.24    | 0.17    | 0.07       | 0.008   |
| cg10190509 | <i>CCL16</i>  | 17  | FALSE      | 0.7     | 0.63    | 0.07       | 0.029   |
| cg19393006 | <i>TSC1</i>   | 9   | FALSE      | 0.49    | 0.42    | 0.07       | 0.005   |
| cg00186701 | <i>TSPYL5</i> | 8   | TRUE       | 0.43    | 0.36    | 0.07       | 0.026   |

|            |                 |    |       |      |      |       |        |
|------------|-----------------|----|-------|------|------|-------|--------|
| cg09025324 | <i>SART2</i>    | 6  | TRUE  | 0.2  | 0.14 | 0.06  | 0.03   |
| cg08321346 | <i>ANKMY1</i>   | 2  | TRUE  | 0.21 | 0.14 | 0.06  | 0.034  |
| cg25316898 | <i>C18orf21</i> | 18 | TRUE  | 0.17 | 0.1  | 0.06  | 0.047  |
| cg00648883 | <i>EEF1DP3</i>  | 13 | FALSE | 0.36 | 0.3  | 0.06  | 0.028  |
| cg17903316 | <i>LOXHD1</i>   | 18 | FALSE | 0.36 | 0.3  | 0.06  | 0.047  |
| cg26154999 | <i>FAM124B</i>  | 2  | TRUE  | 0.36 | 0.31 | 0.06  | 0.038  |
| cg10098888 | <i>IRS1</i>     | 2  | TRUE  | 0.17 | 0.11 | 0.06  | 0.017  |
| cg01193293 | <i>SIGLEC7</i>  | 19 | FALSE | 0.52 | 0.46 | 0.06  | 0.05   |
| cg22062068 | <i>HNRNPG-T</i> | 11 | TRUE  | 0.55 | 0.5  | 0.06  | 0.043  |
| cg12782180 | <i>LEP</i>      | 7  | TRUE  | 0.3  | 0.25 | 0.06  | 0.008  |
| cg21053323 | <i>SUMO3</i>    | 21 | TRUE  | 0.19 | 0.13 | 0.06  | 0.042  |
| cg00929606 | <i>ZNF3</i>     | 7  | TRUE  | 0.31 | 0.26 | 0.05  | 0.023  |
| cg21019522 | <i>SLC22A18</i> | 11 | FALSE | 0.3  | 0.24 | 0.05  | 0.017  |
| cg24664957 | <i>VPS37B</i>   | 12 | TRUE  | 0.51 | 0.46 | 0.05  | 0.003  |
| cg11405695 | <i>ATAD3C</i>   | 1  | FALSE | 0.53 | 0.48 | 0.05  | 0.028  |
| cg06476606 | <i>IFIT2</i>    | 10 | FALSE | 0.15 | 0.09 | 0.05  | 0.017  |
| cg03160637 | <i>DDB1</i>     | 11 | TRUE  | 0.15 | 0.1  | 0.05  | 0.031  |
| cg22222251 | <i>WBSCR19</i>  | 7  | FALSE | 0.67 | 0.62 | 0.05  | 0.008  |
| cg14679202 | <i>L3MBTL2</i>  | 22 | TRUE  | 0.39 | 0.34 | 0.05  | 0.027  |
| cg03811411 | <i>SGCD</i>     | 5  | FALSE | 0.65 | 0.7  | -0.05 | 0.018  |
| cg16504670 | <i>DEF8</i>     | 16 | TRUE  | 0.77 | 0.82 | -0.05 | 0.009  |
| cg05654163 | <i>SLC39A2</i>  | 14 | FALSE | 0.62 | 0.67 | -0.05 | 0.011  |
| cg03190825 | <i>CYP4F11</i>  | 19 | FALSE | 0.43 | 0.48 | -0.05 | 0.023  |
| cg21011830 | <i>RPL18A</i>   | 19 | TRUE  | 0.06 | 0.11 | -0.05 | 0.011  |
| cg04452713 | <i>DST</i>      | 6  | TRUE  | 0.26 | 0.31 | -0.05 | 0.003  |
| cg06563300 | <i>SLC17A8</i>  | 12 | FALSE | 0.21 | 0.26 | -0.05 | 0.018  |
| cg07039113 | <i>S100A9</i>   | 1  | FALSE | 0.73 | 0.78 | -0.05 | 0.004  |
| cg14290291 | <i>MZT2B</i>    | 2  | FALSE | 0.43 | 0.48 | -0.05 | 0.001  |
| cg06112415 | <i>CGREF1</i>   | 2  | TRUE  | 0.37 | 0.42 | -0.05 | <0.001 |
| cg24603941 | <i>MIA2</i>     | 14 | FALSE | 0.68 | 0.74 | -0.05 | 0.003  |
| cg13980719 | <i>TNP1</i>     | 2  | FALSE | 0.5  | 0.55 | -0.05 | 0.022  |
| cg24041453 | <i>CCDC11</i>   | 18 | TRUE  | 0.13 | 0.19 | -0.05 | 0.024  |
| cg01031251 | <i>RPS6KA1</i>  | 1  | TRUE  | 0.57 | 0.62 | -0.05 | 0.004  |
| cg05333568 | <i>CCDC185</i>  | 1  | TRUE  | 0.28 | 0.34 | -0.05 | 0.043  |
| cg04893119 | <i>PI15</i>     | 8  | FALSE | 0.57 | 0.63 | -0.05 | 0.031  |
| cg03573747 | <i>ADIPOQ</i>   | 3  | FALSE | 0.73 | 0.78 | -0.06 | 0.006  |
| cg00626466 | <i>GNS</i>      | 12 | TRUE  | 0.54 | 0.59 | -0.06 | 0.022  |
| cg05885720 | <i>EMP1</i>     | 12 | FALSE | 0.63 | 0.69 | -0.06 | 0.007  |
| cg20781967 | <i>NINJ2</i>    | 12 | FALSE | 0.34 | 0.4  | -0.06 | 0.032  |

|            |                 |    |       |      |      |       |        |
|------------|-----------------|----|-------|------|------|-------|--------|
| cg24833277 | <i>FAM83A</i>   | 8  | TRUE  | 0.64 | 0.7  | -0.06 | 0.041  |
| cg21048669 | <i>CLEC3A</i>   | 16 | FALSE | 0.48 | 0.53 | -0.06 | 0.026  |
| cg27525902 | <i>FGF7</i>     | 15 | FALSE | 0.52 | 0.58 | -0.06 | 0.028  |
| cg21550483 | <i>CLEC10A</i>  | 17 | FALSE | 0.39 | 0.44 | -0.06 | 0.043  |
| cg19592945 | <i>P2RXL1</i>   | 22 | FALSE | 0.34 | 0.4  | -0.06 | 0.047  |
| cg18847227 | <i>SUMF1</i>    | 3  | TRUE  | 0.42 | 0.48 | -0.06 | 0.006  |
| cg21686987 | <i>CTRB1</i>    | 16 | FALSE | 0.75 | 0.81 | -0.06 | <0.001 |
| cg03793778 | <i>LGALS7</i>   | 19 | FALSE | 0.57 | 0.63 | -0.06 | 0.044  |
| cg18344063 | <i>MGAT4C</i>   | 12 | FALSE | 0.57 | 0.64 | -0.06 | 0.047  |
| cg21832243 | <i>TTC3</i>     | 21 | FALSE | 0.3  | 0.36 | -0.06 | 0.038  |
| cg00673191 | <i>DOPEY2</i>   | 21 | FALSE | 0.3  | 0.36 | -0.06 | 0.038  |
| cg15302379 | <i>KAZALD1</i>  | 10 | TRUE  | 0.56 | 0.62 | -0.07 | 0.001  |
| cg21126707 | <i>MYF5</i>     | 12 | TRUE  | 0.5  | 0.57 | -0.07 | 0.001  |
| cg05293216 | <i>FANCG</i>    | 9  | TRUE  | 0.6  | 0.67 | -0.07 | 0.01   |
| cg26185508 | <i>CDCP2</i>    | 1  | TRUE  | 0.41 | 0.48 | -0.07 | 0.025  |
| cg07221454 | <i>MS4A10</i>   | 11 | FALSE | 0.62 | 0.69 | -0.07 | 0.041  |
| cg15149938 | <i>C22orf34</i> | 22 | FALSE | 0.64 | 0.71 | -0.07 | 0.007  |
| cg02276665 | <i>CTNNA1</i>   | 5  | TRUE  | 0.39 | 0.47 | -0.09 | <0.001 |
| cg02288165 | <i>SN</i>       | 20 | FALSE | 0.33 | 0.42 | -0.09 | 0.006  |

**Table S3. List of DMCs in VAT in the comparison between the DO and NDO groups**

| Target ID  | Symbol            | CHR | CPG Island | Beta DO | Beta OB | Delta Beta | <i>p</i> -value |
|------------|-------------------|-----|------------|---------|---------|------------|-----------------|
| cg17687883 | <i>MTHFD2</i>     | 2   | TRUE       | 0.21    | 0.06    | 0.16       | 0.009           |
| cg02964385 | <i>STK38</i>      | 6   | FALSE      | 0.58    | 0.42    | 0.16       | 0.036           |
| cg15235832 | <i>ACTR2</i>      | 2   | TRUE       | 0.27    | 0.14    | 0.13       | 0.002           |
| cg17872476 | <i>VTI1A</i>      | 10  | FALSE      | 0.40    | 0.28    | 0.12       | 0.001           |
| cg22438810 | <i>LCN2</i>       | 9   | FALSE      | 0.66    | 0.54    | 0.11       | 0.023           |
| cg01734338 | <i>KCNQ1</i>      | 11  | TRUE       | 0.74    | 0.63    | 0.11       | 0.001           |
| cg04570669 | <i>APIN</i>       | 4   | FALSE      | 0.56    | 0.46    | 0.11       | <0.001          |
| cg11237738 | <i>LINC01587</i>  | 4   | FALSE      | 0.70    | 0.59    | 0.10       | 0.008           |
| cg14074641 | <i>ABCC12</i>     | 16  | FALSE      | 0.39    | 0.30    | 0.09       | 0.003           |
| cg01120761 | <i>CLEC4C</i>     | 12  | FALSE      | 0.77    | 0.68    | 0.09       | 0.040           |
| cg02719634 | <i>SLC22A18A5</i> | 11  | FALSE      | 0.84    | 0.75    | 0.09       | 0.032           |
| cg20622019 | <i>ADA</i>        | 20  | TRUE       | 0.37    | 0.28    | 0.09       | 0.039           |
| cg21755709 | <i>PDXK</i>       | 21  | TRUE       | 0.71    | 0.62    | 0.09       | 0.004           |
| cg14732540 | <i>BRDT</i>       | 1   | TRUE       | 0.86    | 0.77    | 0.09       | 0.008           |
| cg13906813 | <i>HLA-DPA1</i>   | 6   | FALSE      | 0.57    | 0.48    | 0.09       | 0.029           |
| cg21781546 | <i>ZNF142</i>     | 2   | FALSE      | 0.70    | 0.63    | 0.08       | <0.001          |
| cg27212977 | <i>DEFA6</i>      | 8   | FALSE      | 0.81    | 0.73    | 0.08       | <0.001          |
| cg12218747 | <i>SETD4</i>      | 21  | TRUE       | 0.68    | 0.61    | 0.08       | 0.007           |
| cg17994910 | <i>CCDC30</i>     | 1   | FALSE      | 0.49    | 0.41    | 0.08       | 0.013           |
| cg17758148 | <i>JMY</i>        | 5   | FALSE      | 0.42    | 0.34    | 0.08       | 0.036           |
| cg04601137 | <i>ADAMTSL5</i>   | 19  | FALSE      | 0.40    | 0.32    | 0.08       | 0.021           |
| cg17496921 | <i>TSPAN16</i>    | 19  | FALSE      | 0.31    | 0.24    | 0.07       | 0.035           |
| cg11376198 | <i>AFAR3</i>      | 1   | TRUE       | 0.22    | 0.14    | 0.07       | 0.030           |
| cg21784940 | <i>REPIN1</i>     | 7   | FALSE      | 0.43    | 0.35    | 0.07       | 0.001           |
| cg25112853 | <i>HSC20</i>      | 22  | FALSE      | 0.57    | 0.50    | 0.07       | 0.030           |
| cg15792367 | <i>KLK11</i>      | 19  | FALSE      | 0.58    | 0.50    | 0.07       | 0.021           |
| cg13525683 | <i>TIAF1</i>      | 17  | TRUE       | 0.73    | 0.66    | 0.07       | 0.010           |
| cg13044136 | <i>AES</i>        | 19  | TRUE       | 0.16    | 0.09    | 0.07       | 0.011           |
| cg11147886 | <i>NFAT5</i>      | 16  | FALSE      | 0.73    | 0.66    | 0.07       | 0.046           |
| cg24612198 | <i>CD3E</i>       | 11  | FALSE      | 0.58    | 0.51    | 0.07       | <0.001          |
| cg18236297 | <i>CYSLTR2</i>    | 13  | FALSE      | 0.53    | 0.46    | 0.07       | 0.035           |
| cg09325101 | <i>OSTbeta</i>    | 15  | FALSE      | 0.25    | 0.18    | 0.07       | 0.048           |
| cg01817393 | <i>GNAS</i>       | 20  | TRUE       | 0.28    | 0.22    | 0.07       | 0.013           |
| cg11584936 | <i>BNIPL</i>      | 1   | FALSE      | 0.67    | 0.60    | 0.07       | 0.045           |
| cg08666623 | <i>ST6GALNAC2</i> | 17  | FALSE      | 0.22    | 0.15    | 0.07       | 0.028           |
| cg21644628 | <i>HEATR3</i>     | 16  | FALSE      | 0.63    | 0.56    | 0.07       | 0.009           |



|            |                  |    |       |      |      |      |        |
|------------|------------------|----|-------|------|------|------|--------|
| cg19468534 | <i>NUSAP1</i>    | 15 | FALSE | 0.55 | 0.49 | 0.07 | <0.001 |
| cg19103704 | <i>FCGBP</i>     | 19 | FALSE | 0.46 | 0.39 | 0.07 | 0.024  |
| cg27044702 | <i>TPSAB1</i>    | 16 | FALSE | 0.70 | 0.64 | 0.07 | 0.042  |
| cg00943909 | <i>GNAS</i>      | 20 | TRUE  | 0.51 | 0.44 | 0.07 | 0.029  |
| cg04008843 | <i>TTR</i>       | 18 | FALSE | 0.51 | 0.45 | 0.06 | 0.006  |
| cg11151665 | <i>PSG6</i>      | 19 | FALSE | 0.81 | 0.75 | 0.06 | <0.001 |
| cg19740969 | <i>CXCL9</i>     | 4  | FALSE | 0.74 | 0.68 | 0.06 | 0.007  |
| cg15862544 | <i>EGFL4</i>     | 19 | FALSE | 0.83 | 0.77 | 0.06 | 0.021  |
| cg23154064 | <i>FAM208A</i>   | 3  | FALSE | 0.59 | 0.53 | 0.06 | 0.001  |
| cg19279346 | <i>LILRB2</i>    | 19 | FALSE | 0.68 | 0.62 | 0.06 | 0.005  |
| cg09559551 | <i>RSC1A1</i>    | 1  | FALSE | 0.78 | 0.72 | 0.06 | 0.024  |
| cg02212280 | <i>MMP1</i>      | 11 | FALSE | 0.80 | 0.74 | 0.06 | <0.001 |
| cg20812929 | <i>DHRS4L2</i>   | 14 | TRUE  | 0.31 | 0.25 | 0.06 | 0.022  |
| cg08046471 | <i>CXCL11</i>    | 4  | FALSE | 0.72 | 0.66 | 0.06 | 0.025  |
| cg27016609 | <i>STON1</i>     | 2  | FALSE | 0.49 | 0.44 | 0.06 | 0.001  |
| cg26981881 | <i>DEC1</i>      | 9  | FALSE | 0.73 | 0.67 | 0.06 | 0.039  |
| cg09873510 | <i>NLN</i>       | 5  | FALSE | 0.67 | 0.62 | 0.06 | 0.015  |
| cg13982505 | <i>KCNJ13</i>    | 2  | FALSE | 0.71 | 0.66 | 0.06 | 0.003  |
| cg25803423 | <i>C14orf119</i> | 14 | TRUE  | 0.15 | 0.09 | 0.06 | 0.028  |
| cg27383744 | <i>BRCA1</i>     | 17 | TRUE  | 0.84 | 0.79 | 0.06 | 0.001  |
| cg27661264 | <i>GNAS</i>      | 20 | TRUE  | 0.28 | 0.22 | 0.05 | 0.030  |
| cg08972170 | <i>Ells1</i>     | 7  | TRUE  | 0.73 | 0.67 | 0.05 | 0.036  |
| cg06776256 | <i>GPRC5A</i>    | 12 | TRUE  | 0.33 | 0.28 | 0.05 | 0.044  |
| cg11003133 | <i>AIM2</i>      | 1  | FALSE | 0.86 | 0.81 | 0.05 | 0.032  |
| cg17606194 | <i>SYCE1</i>     | 10 | TRUE  | 0.47 | 0.41 | 0.05 | 0.037  |
| cg14837082 | <i>HRH1</i>      | 3  | FALSE | 0.65 | 0.60 | 0.05 | 0.015  |
| cg11251498 | <i>INDOL1</i>    | 8  | FALSE | 0.21 | 0.16 | 0.05 | 0.002  |
| cg20895028 | <i>CDH26</i>     | 20 | FALSE | 0.79 | 0.74 | 0.05 | <0.001 |
| cg16879115 | <i>APOBEC1</i>   | 12 | FALSE | 0.70 | 0.65 | 0.05 | 0.021  |
| cg25743584 | <i>TIAF1</i>     | 17 | FALSE | 0.69 | 0.64 | 0.05 | 0.001  |
| cg09964921 | <i>KCNE1</i>     | 21 | FALSE | 0.78 | 0.73 | 0.05 | 0.002  |
| cg22726338 | <i>AKNAD1</i>    | 1  | FALSE | 0.68 | 0.62 | 0.05 | 0.011  |
| cg27090087 | <i>TINAG</i>     | 6  | FALSE | 0.51 | 0.45 | 0.05 | 0.032  |
| cg17896229 | <i>PROKR2</i>    | 20 | TRUE  | 0.61 | 0.56 | 0.05 | 0.005  |
| cg25372103 | <i>DLL1</i>      | 6  | TRUE  | 0.28 | 0.23 | 0.05 | 0.003  |
| cg02131853 | <i>TMEM156</i>   | 4  | FALSE | 0.70 | 0.65 | 0.05 | <0.001 |
| cg25420952 | <i>AMBP</i>      | 9  | FALSE | 0.79 | 0.74 | 0.05 | 0.049  |
| cg25650811 | <i>CCDC129</i>   | 7  | TRUE  | 0.59 | 0.54 | 0.05 | 0.008  |
| cg20891917 | <i>IFRD1</i>     | 7  | FALSE | 0.86 | 0.81 | 0.05 | 0.001  |

|            |                  |    |       |      |      |       |        |
|------------|------------------|----|-------|------|------|-------|--------|
| cg15344028 | <i>ICOS</i>      | 2  | FALSE | 0.74 | 0.69 | 0.05  | 0.031  |
| cg23580000 | <i>ADCY7</i>     | 16 | TRUE  | 0.87 | 0.82 | 0.05  | 0.040  |
| cg00182461 | <i>PPIL3</i>     | 2  | TRUE  | 0.14 | 0.09 | 0.05  | 0.004  |
| cg15674997 | <i>GRM6</i>      | 5  | TRUE  | 0.35 | 0.40 | -0.05 | 0.001  |
| cg10316764 | <i>TAOK2</i>     | 16 | TRUE  | 0.35 | 0.40 | -0.05 | 0.038  |
| cg12958778 | <i>TBC1D14</i>   | 4  | TRUE  | 0.47 | 0.52 | -0.05 | 0.033  |
| cg06637774 | <i>P2RY6</i>     | 11 | TRUE  | 0.24 | 0.29 | -0.05 | 0.025  |
| cg16601861 | <i>ALDH1A1</i>   | 9  | FALSE | 0.34 | 0.39 | -0.05 | 0.043  |
| cg25509184 | <i>CFTR</i>      | 7  | TRUE  | 0.57 | 0.62 | -0.05 | 0.024  |
| cg00968931 | <i>MRPL54</i>    | 19 | FALSE | 0.69 | 0.74 | -0.05 | 0.025  |
| cg17692403 | <i>R3HDML</i>    | 20 | FALSE | 0.13 | 0.18 | -0.05 | 0.006  |
| cg00666746 | <i>SYDE1</i>     | 19 | TRUE  | 0.11 | 0.16 | -0.05 | 0.001  |
| cg10929387 | <i>ITIH4</i>     | 3  | FALSE | 0.82 | 0.87 | -0.05 | 0.017  |
| cg09354267 | <i>ATG5</i>      | 6  | TRUE  | 0.28 | 0.34 | -0.05 | 0.049  |
| cg25938646 | <i>SLITRK1</i>   | 13 | TRUE  | 0.42 | 0.47 | -0.05 | 0.023  |
| cg00296685 | <i>GTF2H4</i>    | 6  | TRUE  | 0.44 | 0.49 | -0.05 | 0.004  |
| cg25356886 | <i>CRYGD</i>     | 2  | TRUE  | 0.42 | 0.47 | -0.05 | 0.005  |
| cg02337166 | <i>NR1D1</i>     | 17 | FALSE | 0.10 | 0.15 | -0.05 | 0.036  |
| cg07880854 | <i>FBLN7</i>     | 2  | FALSE | 0.17 | 0.22 | -0.05 | 0.007  |
| cg09893305 | <i>HAPLN1</i>    | 5  | FALSE | 0.50 | 0.55 | -0.05 | 0.040  |
| cg27465566 | <i>TRIO</i>      | 5  | TRUE  | 0.30 | 0.35 | -0.05 | 0.007  |
| cg19903229 | <i>C14orf105</i> | 14 | FALSE | 0.57 | 0.62 | -0.05 | 0.013  |
| cg10537269 | <i>TIMM9</i>     | 14 | TRUE  | 0.20 | 0.25 | -0.05 | 0.041  |
| cg15343119 | <i>GALR1</i>     | 18 | TRUE  | 0.19 | 0.24 | -0.05 | 0.004  |
| cg08041019 | <i>ATXN2</i>     | 12 | TRUE  | 0.23 | 0.29 | -0.05 | 0.005  |
| cg10731149 | <i>CYBRD1</i>    | 2  | TRUE  | 0.59 | 0.64 | -0.05 | 0.010  |
| cg07657236 | <i>KCNH8</i>     | 3  | TRUE  | 0.18 | 0.24 | -0.05 | 0.002  |
| cg00567749 | <i>CSPG2</i>     | 5  | TRUE  | 0.34 | 0.40 | -0.05 | 0.015  |
| cg08445039 | <i>FKBP9</i>     | 7  | TRUE  | 0.13 | 0.18 | -0.05 | 0.033  |
| cg03464655 | <i>SLC38A11</i>  | 2  | TRUE  | 0.22 | 0.27 | -0.05 | 0.026  |
| cg10742801 | <i>PRAP1</i>     | 10 | FALSE | 0.29 | 0.34 | -0.05 | 0.007  |
| cg02065387 | <i>GABRA1</i>    | 5  | FALSE | 0.56 | 0.62 | -0.05 | 0.047  |
| cg22193702 | <i>PADI1</i>     | 1  | FALSE | 0.82 | 0.87 | -0.05 | 0.047  |
| cg19188060 | <i>PSMD2</i>     | 3  | TRUE  | 0.13 | 0.19 | -0.05 | <0.001 |
| cg09604428 | <i>PB1</i>       | 3  | FALSE | 0.88 | 0.93 | -0.05 | 0.025  |
| cg02318535 | <i>PPM1E</i>     | 17 | TRUE  | 0.78 | 0.83 | -0.05 | 0.048  |
| cg09788239 | <i>PCQAP</i>     | 22 | TRUE  | 0.12 | 0.17 | -0.05 | 0.003  |
| cg03743584 | <i>PRAP1</i>     | 10 | FALSE | 0.18 | 0.23 | -0.05 | 0.020  |
| cg08223748 | <i>MEF2C</i>     | 5  | TRUE  | 0.25 | 0.30 | -0.05 | 0.008  |

|            |          |    |       |      |      |       |        |
|------------|----------|----|-------|------|------|-------|--------|
| cg07536847 | PAX7     | 1  | TRUE  | 0.16 | 0.21 | -0.05 | 0.006  |
| cg16468910 | SNX4     | 3  | TRUE  | 0.27 | 0.33 | -0.05 | 0.022  |
| cg16046951 | MKKS     | 20 | TRUE  | 0.21 | 0.26 | -0.05 | 0.025  |
| cg16168311 | APOA1BP  | 1  | TRUE  | 0.10 | 0.15 | -0.05 | 0.001  |
| cg16608652 | B3GALT2  | 1  | FALSE | 0.81 | 0.86 | -0.05 | 0.038  |
| cg08261177 | ALDH16A1 | 19 | TRUE  | 0.07 | 0.12 | -0.05 | 0.010  |
| cg15014458 | LYPD3    | 19 | FALSE | 0.24 | 0.30 | -0.05 | 0.037  |
| cg18411898 | RPRM     | 2  | TRUE  | 0.38 | 0.43 | -0.05 | 0.002  |
| cg17509872 | CNOT7    | 8  | FALSE | 0.28 | 0.34 | -0.05 | 0.018  |
| cg15109571 | SUFU     | 10 | TRUE  | 0.07 | 0.13 | -0.05 | 0.001  |
| cg02727285 | RELB     | 19 | TRUE  | 0.38 | 0.43 | -0.05 | 0.035  |
| cg26815021 | SFRS2    | 17 | TRUE  | 0.17 | 0.23 | -0.05 | <0.001 |
| cg08207256 | DNM2     | 19 | TRUE  | 0.17 | 0.22 | -0.05 | 0.003  |
| cg11885098 | EFNA2    | 19 | TRUE  | 0.23 | 0.28 | -0.05 | 0.009  |
| cg24958765 | RAB4B    | 19 | TRUE  | 0.15 | 0.20 | -0.05 | 0.009  |
| cg00021527 | TAF15    | 17 | TRUE  | 0.09 | 0.15 | -0.05 | 0.010  |
| cg19948393 | ANKRD33  | 12 | TRUE  | 0.48 | 0.54 | -0.05 | 0.030  |
| cg08054038 | PVRL2    | 19 | TRUE  | 0.46 | 0.51 | -0.05 | 0.003  |
| cg22430790 | FRMD6    | 14 | TRUE  | 0.20 | 0.25 | -0.06 | 0.001  |
| cg09209002 | SAS10    | 4  | TRUE  | 0.09 | 0.14 | -0.06 | 0.027  |
| cg18001427 | RWDD2B   | 21 | TRUE  | 0.16 | 0.22 | -0.06 | 0.032  |
| cg16195804 | C12orf65 | 12 | TRUE  | 0.16 | 0.21 | -0.06 | 0.008  |
| cg06150803 | TNFRSF19 | 13 | FALSE | 0.23 | 0.28 | -0.06 | 0.004  |
| cg17166812 | NDUFS2   | 1  | FALSE | 0.24 | 0.29 | -0.06 | 0.041  |
| cg23061257 | YIPF1    | 1  | TRUE  | 0.25 | 0.31 | -0.06 | 0.019  |
| cg06543018 | RBP1     | 3  | TRUE  | 0.19 | 0.25 | -0.06 | 0.017  |
| cg15350194 | FAM70B   | 13 | TRUE  | 0.28 | 0.34 | -0.06 | 0.003  |
| cg01190915 | MT2A     | 16 | TRUE  | 0.38 | 0.44 | -0.06 | 0.036  |
| cg02630888 | FBXL5    | 4  | TRUE  | 0.64 | 0.70 | -0.06 | 0.034  |
| cg20513206 | C19orf47 | 19 | TRUE  | 0.65 | 0.70 | -0.06 | 0.048  |
| cg12619509 | DNASE1L2 | 16 | TRUE  | 0.25 | 0.31 | -0.06 | <0.001 |
| cg20867633 | GOLT1A   | 1  | TRUE  | 0.33 | 0.39 | -0.06 | 0.002  |
| cg20449692 | CLDN11   | 3  | TRUE  | 0.06 | 0.12 | -0.06 | 0.002  |
| cg23771929 | FREQ     | 9  | TRUE  | 0.19 | 0.25 | -0.06 | 0.013  |
| cg05154390 | MRPS15   | 1  | TRUE  | 0.17 | 0.23 | -0.06 | 0.014  |
| cg01333131 | CDC42BPB | 14 | TRUE  | 0.13 | 0.19 | -0.06 | 0.010  |
| cg09164559 | KIAA1279 | 10 | TRUE  | 0.24 | 0.30 | -0.06 | 0.047  |
| cg08361238 | PTGFRN   | 1  | TRUE  | 0.38 | 0.44 | -0.06 | 0.037  |
| cg24083641 | MGC46496 | 4  | TRUE  | 0.40 | 0.45 | -0.06 | 0.013  |

|            |                 |    |       |      |      |       |        |
|------------|-----------------|----|-------|------|------|-------|--------|
| cg02586730 | <i>EFEMP2</i>   | 11 | TRUE  | 0.38 | 0.44 | -0.06 | 0.044  |
| cg05856931 | <i>MSI2</i>     | 17 | TRUE  | 0.52 | 0.57 | -0.06 | 0.003  |
| cg07425555 | <i>FLJ23447</i> | 19 | FALSE | 0.27 | 0.33 | -0.06 | 0.002  |
| cg24450312 | <i>RASSF5</i>   | 1  | TRUE  | 0.16 | 0.22 | -0.06 | 0.001  |
| cg14892768 | <i>AXL</i>      | 19 | FALSE | 0.16 | 0.21 | -0.06 | 0.008  |
| cg03942271 | <i>AUH</i>      | 9  | TRUE  | 0.26 | 0.32 | -0.06 | 0.019  |
| cg14191360 | <i>MET</i>      | 7  | TRUE  | 0.60 | 0.66 | -0.06 | 0.047  |
| cg03532005 | <i>PSPH</i>     | 7  | TRUE  | 0.24 | 0.30 | -0.06 | 0.002  |
| cg11503011 | <i>EBF</i>      | 5  | FALSE | 0.16 | 0.22 | -0.06 | 0.001  |
| cg05179880 | <i>PDCD7</i>    | 15 | TRUE  | 0.22 | 0.28 | -0.06 | 0.021  |
| cg00066816 | <i>IL12B</i>    | 5  | TRUE  | 0.35 | 0.41 | -0.06 | 0.029  |
| cg04759439 | <i>CAST1</i>    | 3  | TRUE  | 0.19 | 0.25 | -0.06 | <0.001 |
| cg04065065 | <i>PIGO</i>     | 9  | TRUE  | 0.20 | 0.26 | -0.06 | <0.001 |
| cg11976166 | <i>TGFB2</i>    | 1  | TRUE  | 0.19 | 0.25 | -0.06 | 0.001  |
| cg08697665 | <i>RARRES1</i>  | 3  | TRUE  | 0.33 | 0.39 | -0.06 | 0.011  |
| cg22134325 | <i>NPAS4</i>    | 11 | TRUE  | 0.17 | 0.23 | -0.06 | 0.012  |
| cg08216808 | <i>ARPC2</i>    | 2  | FALSE | 0.22 | 0.28 | -0.06 | 0.009  |
| cg14166009 | <i>HKR1</i>     | 19 | TRUE  | 0.18 | 0.23 | -0.06 | 0.013  |
| cg25482967 | <i>MRPS10</i>   | 6  | TRUE  | 0.31 | 0.36 | -0.06 | 0.010  |
| cg02214188 | <i>BDH2</i>     | 4  | FALSE | 0.47 | 0.52 | -0.06 | 0.004  |
| cg16152813 | <i>FAM57B</i>   | 16 | FALSE | 0.16 | 0.22 | -0.06 | 0.001  |
| cg11466908 | <i>AUH</i>      | 9  | TRUE  | 0.09 | 0.15 | -0.06 | <0.001 |
| cg04371779 | <i>GPATCH2L</i> | 14 | TRUE  | 0.09 | 0.15 | -0.06 | 0.008  |
| cg02401978 | <i>ZNF746</i>   | 7  | FALSE | 0.53 | 0.58 | -0.06 | 0.040  |
| cg01457653 | <i>FBXL8</i>    | 16 | TRUE  | 0.09 | 0.14 | -0.06 | 0.024  |
| cg09310112 | <i>JMJD2B</i>   | 19 | TRUE  | 0.09 | 0.15 | -0.06 | 0.022  |
| cg11418559 | <i>ZNF593</i>   | 1  | TRUE  | 0.27 | 0.33 | -0.06 | 0.025  |
| cg27069753 | <i>ELA3B</i>    | 1  | FALSE | 0.51 | 0.57 | -0.06 | 0.020  |
| cg17593391 | <i>RRAGC</i>    | 1  | TRUE  | 0.26 | 0.32 | -0.06 | 0.046  |
| cg08749917 | <i>RTP1</i>     | 3  | FALSE | 0.43 | 0.49 | -0.06 | 0.029  |
| cg07036530 | <i>GPR26</i>    | 10 | TRUE  | 0.29 | 0.35 | -0.06 | 0.012  |
| cg21151355 | <i>GJB3</i>     | 1  | FALSE | 0.24 | 0.30 | -0.06 | 0.008  |
| cg17166338 | <i>TERT</i>     | 5  | TRUE  | 0.48 | 0.54 | -0.06 | 0.026  |
| cg19350340 | <i>ASPM</i>     | 1  | TRUE  | 0.32 | 0.38 | -0.06 | 0.008  |
| cg22986999 | <i>MRGPRF</i>   | 11 | TRUE  | 0.28 | 0.34 | -0.06 | 0.042  |
| cg27112247 | <i>TMED2</i>    | 12 | TRUE  | 0.53 | 0.59 | -0.06 | <0.001 |
| cg01200177 | <i>POLR2D</i>   | 2  | TRUE  | 0.31 | 0.37 | -0.06 | 0.011  |
| cg11052143 | <i>ALS2CR11</i> | 2  | TRUE  | 0.18 | 0.25 | -0.06 | 0.025  |
| cg03682712 | <i>LOXL1</i>    | 15 | TRUE  | 0.10 | 0.16 | -0.06 | 0.016  |

|            |                 |    |       |      |      |       |        |
|------------|-----------------|----|-------|------|------|-------|--------|
| cg20119051 | <i>R3HDM1</i>   | 2  | TRUE  | 0.48 | 0.54 | -0.06 | 0.001  |
| cg10927536 | <i>SRRD</i>     | 22 | TRUE  | 0.35 | 0.41 | -0.06 | 0.019  |
| cg04845628 | <i>MINA</i>     | 3  | TRUE  | 0.63 | 0.69 | -0.06 | 0.001  |
| cg05194726 | <i>NRIP2</i>    | 12 | FALSE | 0.11 | 0.17 | -0.06 | 0.017  |
| cg11412582 | <i>HERC2</i>    | 15 | TRUE  | 0.12 | 0.18 | -0.06 | 0.024  |
| cg23769143 | <i>TIMP4</i>    | 3  | FALSE | 0.18 | 0.25 | -0.06 | 0.032  |
| cg12256080 | <i>ABT1</i>     | 6  | TRUE  | 0.09 | 0.15 | -0.06 | 0.004  |
| cg11730100 | <i>FEN1</i>     | 11 | TRUE  | 0.23 | 0.29 | -0.06 | 0.002  |
| cg25225238 | <i>GRM3</i>     | 7  | FALSE | 0.33 | 0.39 | -0.06 | 0.039  |
| cg12324629 | <i>ULK2</i>     | 17 | TRUE  | 0.37 | 0.44 | -0.06 | 0.029  |
| cg04532952 | <i>CA4</i>      | 17 | TRUE  | 0.14 | 0.20 | -0.06 | 0.002  |
| cg15557833 | <i>MFSD8</i>    | 4  | TRUE  | 0.25 | 0.32 | -0.06 | <0.001 |
| cg07884019 | <i>HMP19</i>    | 5  | FALSE | 0.28 | 0.34 | -0.06 | 0.047  |
| cg11177693 | <i>ZNF513</i>   | 2  | TRUE  | 0.56 | 0.62 | -0.06 | 0.020  |
| cg21759080 | <i>STX5A</i>    | 11 | TRUE  | 0.13 | 0.19 | -0.06 | 0.021  |
| cg24674220 | <i>GMEB2</i>    | 20 | FALSE | 0.71 | 0.77 | -0.06 | 0.045  |
| cg03098721 | <i>TTL7</i>     | 1  | TRUE  | 0.58 | 0.64 | -0.06 | 0.024  |
| cg25982743 | <i>TIMP4</i>    | 3  | TRUE  | 0.14 | 0.21 | -0.06 | 0.001  |
| cg20856064 | <i>PH-4</i>     | 3  | TRUE  | 0.17 | 0.23 | -0.06 | <0.001 |
| cg24792360 | <i>FUCA1</i>    | 1  | TRUE  | 0.41 | 0.48 | -0.06 | 0.038  |
| cg03513163 | <i>PCDHB1</i>   | 5  | TRUE  | 0.29 | 0.35 | -0.06 | 0.032  |
| cg05587474 | <i>MOV10</i>    | 1  | TRUE  | 0.38 | 0.45 | -0.06 | <0.001 |
| cg17327630 | <i>ZNF212</i>   | 7  | TRUE  | 0.17 | 0.23 | -0.07 | 0.007  |
| cg00647741 | <i>ZNF274</i>   | 19 | FALSE | 0.43 | 0.49 | -0.07 | 0.043  |
| cg11536940 | <i>PGCP</i>     | 8  | TRUE  | 0.25 | 0.32 | -0.07 | 0.038  |
| cg17865752 | <i>CCNT2</i>    | 2  | TRUE  | 0.30 | 0.36 | -0.07 | 0.019  |
| cg19974223 | <i>ANKRD33</i>  | 12 | TRUE  | 0.60 | 0.66 | -0.07 | 0.013  |
| cg21493666 | <i>PPME1</i>    | 11 | TRUE  | 0.20 | 0.26 | -0.07 | 0.005  |
| cg05303448 | <i>AACS</i>     | 12 | TRUE  | 0.22 | 0.29 | -0.07 | 0.001  |
| cg10994379 | <i>CAPSL</i>    | 5  | FALSE | 0.37 | 0.44 | -0.07 | 0.050  |
| cg00571634 | <i>WDR5B</i>    | 3  | TRUE  | 0.41 | 0.48 | -0.07 | 0.003  |
| cg14920846 | <i>NAV1</i>     | 1  | TRUE  | 0.42 | 0.48 | -0.07 | 0.025  |
| cg08707819 | <i>RCOR1</i>    | 14 | TRUE  | 0.35 | 0.42 | -0.07 | 0.001  |
| cg24362726 | <i>C4orf33</i>  | 4  | FALSE | 0.64 | 0.71 | -0.07 | 0.048  |
| cg26431343 | <i>HSPC117</i>  | 22 | FALSE | 0.48 | 0.55 | -0.07 | 0.005  |
| cg11908570 | <i>KIAA0040</i> | 1  | TRUE  | 0.24 | 0.31 | -0.07 | 0.001  |
| cg22972055 | <i>UNC84A</i>   | 7  | TRUE  | 0.68 | 0.75 | -0.07 | 0.019  |
| cg17783509 | <i>PHOX2B</i>   | 4  | FALSE | 0.30 | 0.37 | -0.07 | 0.009  |
| cg23547429 | <i>SLC43A3</i>  | 11 | FALSE | 0.20 | 0.26 | -0.07 | <0.001 |

|            |                  |    |       |      |      |       |        |
|------------|------------------|----|-------|------|------|-------|--------|
| cg14435807 | <i>LOXL1</i>     | 15 | TRUE  | 0.13 | 0.20 | -0.07 | 0.002  |
| cg05257610 | <i>NDUFAF7</i>   | 2  | FALSE | 0.57 | 0.64 | -0.07 | 0.039  |
| cg01860753 | <i>RASSF5</i>    | 1  | TRUE  | 0.22 | 0.29 | -0.07 | 0.012  |
| cg12271671 | <i>FGL2</i>      | 7  | FALSE | 0.29 | 0.35 | -0.07 | 0.016  |
| cg07129274 | <i>HIST1H2AL</i> | 6  | TRUE  | 0.27 | 0.34 | -0.07 | 0.012  |
| cg02860543 | <i>IGF2BP3</i>   | 7  | TRUE  | 0.42 | 0.49 | -0.07 | 0.043  |
| cg25345738 | <i>PWP1</i>      | 12 | FALSE | 0.16 | 0.22 | -0.07 | 0.018  |
| cg01718365 | <i>AOF2</i>      | 1  | TRUE  | 0.24 | 0.31 | -0.07 | 0.008  |
| cg01288089 | <i>CXCL10</i>    | 4  | FALSE | 0.25 | 0.32 | -0.07 | <0.001 |
| cg02147791 | <i>SAP18</i>     | 13 | TRUE  | 0.22 | 0.29 | -0.07 | 0.035  |
| cg09404633 | <i>LMOD1</i>     | 1  | TRUE  | 0.21 | 0.28 | -0.07 | 0.001  |
| cg15868302 | <i>FOXD2</i>     | 1  | TRUE  | 0.42 | 0.49 | -0.07 | 0.018  |
| cg09047884 | <i>TLL1</i>      | 22 | TRUE  | 0.58 | 0.65 | -0.07 | 0.001  |
| cg02849695 | <i>CCDC19</i>    | 1  | TRUE  | 0.24 | 0.31 | -0.07 | 0.001  |
| cg07693270 | <i>RPL39L</i>    | 3  | TRUE  | 0.41 | 0.48 | -0.07 | <0.001 |
| cg03160508 | <i>RHOD</i>      | 11 | TRUE  | 0.18 | 0.25 | -0.07 | 0.015  |
| cg18632102 | <i>CNOT8</i>     | 5  | TRUE  | 0.37 | 0.44 | -0.07 | 0.020  |
| cg20426860 | <i>FLJ20422</i>  | 19 | TRUE  | 0.18 | 0.25 | -0.07 | 0.006  |
| cg24088408 | <i>E2F1</i>      | 20 | TRUE  | 0.53 | 0.61 | -0.07 | 0.027  |
| cg21422208 | <i>RFT1</i>      | 3  | TRUE  | 0.28 | 0.35 | -0.07 | 0.011  |
| cg19453250 | <i>STAT1P1</i>   | 18 | FALSE | 0.31 | 0.38 | -0.07 | 0.007  |
| cg18847227 | <i>SUMF1</i>     | 3  | TRUE  | 0.39 | 0.47 | -0.07 | 0.015  |
| cg27239157 | <i>MCF2L2</i>    | 3  | TRUE  | 0.41 | 0.48 | -0.07 | <0.001 |
| cg15815843 | <i>MFAP5</i>     | 12 | FALSE | 0.72 | 0.79 | -0.07 | 0.017  |
| cg20773127 | <i>ENPEP</i>     | 4  | TRUE  | 0.41 | 0.48 | -0.07 | 0.037  |
| cg03876622 | <i>CSDA</i>      | 12 | TRUE  | 0.21 | 0.29 | -0.07 | 0.017  |
| cg14036856 | <i>MGC52423</i>  | 1  | FALSE | 0.62 | 0.69 | -0.07 | 0.025  |
| cg17387870 | <i>CHFR</i>      | 12 | TRUE  | 0.24 | 0.31 | -0.07 | 0.017  |
| cg11672225 | <i>RNF185</i>    | 22 | TRUE  | 0.20 | 0.27 | -0.07 | 0.006  |
| cg01337047 | <i>DSG1</i>      | 18 | FALSE | 0.46 | 0.53 | -0.07 | 0.048  |
| cg08713365 | <i>C20orf98</i>  | 20 | TRUE  | 0.08 | 0.16 | -0.07 | 0.017  |
| cg14711201 | <i>SKP2</i>      | 5  | TRUE  | 0.14 | 0.21 | -0.07 | 0.001  |
| cg07460665 | <i>CALCOCO2</i>  | 17 | TRUE  | 0.16 | 0.23 | -0.07 | 0.002  |
| cg19759064 | <i>PHKG1</i>     | 7  | FALSE | 0.29 | 0.36 | -0.07 | 0.046  |
| cg11816577 | <i>YWHAE</i>     | 17 | TRUE  | 0.15 | 0.23 | -0.07 | 0.047  |
| cg18977436 | <i>FGF14</i>     | 13 | FALSE | 0.32 | 0.39 | -0.08 | 0.006  |
| cg26924825 | <i>LCAT</i>      | 16 | FALSE | 0.54 | 0.62 | -0.08 | 0.039  |
| cg15881727 | <i>ZBED4</i>     | 22 | TRUE  | 0.11 | 0.18 | -0.08 | 0.001  |
| cg00674922 | <i>SATB1</i>     | 3  | TRUE  | 0.39 | 0.46 | -0.08 | 0.005  |

|            |                  |    |       |      |      |       |       |
|------------|------------------|----|-------|------|------|-------|-------|
| cg05624932 | <i>CRISPLD1</i>  | 8  | TRUE  | 0.35 | 0.42 | -0.08 | 0.031 |
| cg17378989 | <i>ERCC1</i>     | 19 | TRUE  | 0.32 | 0.40 | -0.08 | 0.020 |
| cg27394046 | <i>XRN2</i>      | 20 | TRUE  | 0.51 | 0.59 | -0.08 | 0.027 |
| cg05333568 | <i>CCDC185</i>   | 1  | TRUE  | 0.26 | 0.34 | -0.08 | 0.019 |
| cg16121444 | <i>NME7</i>      | 1  | TRUE  | 0.16 | 0.23 | -0.08 | 0.025 |
| cg01919208 | <i>LAMB2</i>     | 3  | TRUE  | 0.16 | 0.24 | -0.08 | 0.009 |
| cg20055101 | <i>ZNF206</i>    | 16 | FALSE | 0.33 | 0.41 | -0.08 | 0.041 |
| cg10217449 | <i>GNPDA2</i>    | 4  | TRUE  | 0.45 | 0.53 | -0.08 | 0.018 |
| cg18964732 | <i>TMCO1</i>     | 1  | TRUE  | 0.16 | 0.24 | -0.08 | 0.002 |
| cg21993406 | <i>CENPH</i>     | 5  | FALSE | 0.32 | 0.40 | -0.08 | 0.039 |
| cg01446393 | <i>FAM107A</i>   | 3  | FALSE | 0.58 | 0.66 | -0.08 | 0.045 |
| cg26284390 | <i>NFKBIZ</i>    | 3  | TRUE  | 0.25 | 0.33 | -0.08 | 0.026 |
| cg13549845 | <i>GRID2</i>     | 4  | TRUE  | 0.48 | 0.56 | -0.08 | 0.011 |
| cg00984602 | <i>SRF</i>       | 6  | TRUE  | 0.20 | 0.28 | -0.08 | 0.001 |
| cg26486702 | <i>USP21</i>     | 1  | TRUE  | 0.23 | 0.31 | -0.08 | 0.022 |
| cg05420896 | <i>DCC</i>       | 18 | TRUE  | 0.29 | 0.37 | -0.08 | 0.007 |
| cg10841258 | <i>CTTNBP2NL</i> | 1  | TRUE  | 0.23 | 0.31 | -0.08 | 0.037 |
| cg12148581 | <i>RPL14</i>     | 3  | TRUE  | 0.41 | 0.49 | -0.08 | 0.028 |
| cg18053607 | <i>PIB5PA</i>    | 22 | FALSE | 0.22 | 0.30 | -0.08 | 0.045 |
| cg12435611 | <i>BRIP1</i>     | 17 | TRUE  | 0.28 | 0.36 | -0.08 | 0.014 |
| cg19972619 | <i>MYC</i>       | 8  | TRUE  | 0.08 | 0.16 | -0.08 | 0.005 |
| cg24333473 | <i>ZNF597</i>    | 16 | TRUE  | 0.23 | 0.31 | -0.08 | 0.032 |
| cg05681757 | <i>FGD4</i>      | 12 | FALSE | 0.34 | 0.43 | -0.09 | 0.001 |
| cg16858125 | <i>ELOVL1</i>    | 1  | TRUE  | 0.45 | 0.54 | -0.09 | 0.018 |
| cg21374864 | <i>TOR1A</i>     | 9  | TRUE  | 0.30 | 0.39 | -0.09 | 0.012 |
| cg06363129 | <i>SOSTDC1</i>   | 7  | FALSE | 0.34 | 0.42 | -0.09 | 0.001 |
| cg03813905 | <i>NDUFB9</i>    | 8  | TRUE  | 0.28 | 0.37 | -0.09 | 0.011 |
| cg01185080 | <i>ZNF710</i>    | 15 | TRUE  | 0.25 | 0.34 | -0.09 | 0.005 |
| cg25162921 | <i>MTAP</i>      | 9  | TRUE  | 0.24 | 0.33 | -0.09 | 0.004 |
| cg23904249 | <i>MGC2574</i>   | 11 | TRUE  | 0.59 | 0.68 | -0.09 | 0.001 |
| cg08005849 | <i>HGF</i>       | 7  | FALSE | 0.38 | 0.47 | -0.09 | 0.005 |
| cg12477119 | <i>CRKRS</i>     | 17 | TRUE  | 0.30 | 0.39 | -0.09 | 0.003 |
| cg04561804 | <i>TLOC1</i>     | 3  | FALSE | 0.30 | 0.39 | -0.09 | 0.025 |
| cg09494546 | <i>SLC16A4</i>   | 1  | FALSE | 0.58 | 0.67 | -0.09 | 0.017 |
| cg24115040 | <i>DLX5</i>      | 7  | TRUE  | 0.42 | 0.51 | -0.09 | 0.021 |
| cg16706631 | <i>HIST1H4E</i>  | 6  | TRUE  | 0.29 | 0.38 | -0.09 | 0.038 |
| cg06609049 | <i>THOP1</i>     | 19 | TRUE  | 0.36 | 0.45 | -0.09 | 0.016 |
| cg08586737 | <i>GCC1</i>      | 7  | TRUE  | 0.30 | 0.39 | -0.09 | 0.038 |
| cg27546682 | <i>STK40</i>     | 1  | TRUE  | 0.29 | 0.38 | -0.09 | 0.004 |

|            |          |    |       |      |      |       |        |
|------------|----------|----|-------|------|------|-------|--------|
| cg15298323 | ACAT2    | 6  | TRUE  | 0.62 | 0.71 | -0.09 | 0.001  |
| cg01745657 | PLCXD2   | 3  | TRUE  | 0.28 | 0.37 | -0.09 | 0.005  |
| cg04975920 | TSPAN1   | 1  | FALSE | 0.47 | 0.56 | -0.09 | 0.047  |
| cg20050113 | SLC9A2   | 2  | TRUE  | 0.35 | 0.44 | -0.09 | 0.016  |
| cg03787486 | ADH5     | 4  | TRUE  | 0.24 | 0.34 | -0.09 | <0.001 |
| cg01985396 | DAAM2    | 6  | FALSE | 0.26 | 0.35 | -0.10 | <0.001 |
| cg15780361 | ALS2CR11 | 2  | TRUE  | 0.33 | 0.43 | -0.10 | 0.006  |
| cg22496254 | HCAP-G   | 4  | FALSE | 0.56 | 0.65 | -0.10 | 0.035  |
| cg23242898 | DCC      | 18 | TRUE  | 0.57 | 0.67 | -0.10 | 0.011  |
| cg06493080 | HOXB7    | 17 | TRUE  | 0.35 | 0.45 | -0.10 | 0.038  |
| cg10735607 | TMEM109  | 11 | TRUE  | 0.53 | 0.63 | -0.10 | 0.048  |
| cg19573166 | SLC22A17 | 14 | FALSE | 0.47 | 0.57 | -0.10 | 0.035  |
| cg27413025 | CYP20A1  | 2  | TRUE  | 0.28 | 0.38 | -0.10 | <0.001 |
| cg24745738 | EDNRB    | 13 | TRUE  | 0.22 | 0.32 | -0.10 | 0.001  |
| cg10003443 | FOXA2    | 20 | TRUE  | 0.36 | 0.46 | -0.10 | 0.010  |
| cg07455279 | NDUFA3   | 19 | TRUE  | 0.21 | 0.31 | -0.10 | 0.046  |
| cg27202708 | CCDC185  | 1  | TRUE  | 0.27 | 0.38 | -0.11 | 0.001  |
| cg03882305 | TRIM50C  | 7  | TRUE  | 0.38 | 0.49 | -0.11 | 0.003  |
| cg26777475 | PCOLCE   | 7  | FALSE | 0.44 | 0.55 | -0.11 | 0.048  |
| cg04689061 | PKIA     | 8  | TRUE  | 0.31 | 0.42 | -0.11 | 0.025  |
| cg03454353 | ZFP37    | 9  | TRUE  | 0.45 | 0.56 | -0.11 | <0.001 |
| cg20229788 | GCKR     | 2  | FALSE | 0.37 | 0.49 | -0.11 | 0.005  |
| cg23970338 | TSFM     | 12 | TRUE  | 0.13 | 0.25 | -0.12 | 0.010  |
| cg21168622 | ZNF350   | 19 | TRUE  | 0.24 | 0.36 | -0.12 | 0.032  |
| cg22502502 | TRIM38   | 6  | FALSE | 0.28 | 0.40 | -0.12 | 0.002  |
| cg08965324 | LTA4H    | 12 | TRUE  | 0.32 | 0.45 | -0.13 | 0.032  |
| cg20587336 | ARMC1    | 8  | TRUE  | 0.35 | 0.49 | -0.14 | 0.006  |
| cg07713361 | APOL1    | 22 | FALSE | 0.41 | 0.55 | -0.14 | 0.003  |
| cg12992720 | EDG4     | 19 | TRUE  | 0.25 | 0.39 | -0.14 | 0.001  |
| cg25125453 | SPTLC3   | 20 | FALSE | 0.44 | 0.58 | -0.15 | 0.002  |
| cg08942800 | CRISP2   | 6  | TRUE  | 0.36 | 0.52 | -0.17 | 0.017  |



**Table S4. List of DMCs in LT in the comparison between the DO and NDO groups**

| Target ID  | Symbol          | CHR | CPG Island | Beta DO | Beta OB | Delta Beta | p-value |
|------------|-----------------|-----|------------|---------|---------|------------|---------|
| cg10296238 | <i>SPATC1L</i>  | 21  | TRUE       | 0.59    | 0.47    | 0.12       | 0.029   |
| cg18145505 | <i>GREM1</i>    | 15  | TRUE       | 0.35    | 0.23    | 0.12       | 0.013   |
| cg23002761 | <i>FBLIM1</i>   | 1   | TRUE       | 0.31    | 0.19    | 0.11       | 0.026   |
| cg10746737 | <i>HLA-DRB5</i> | 6   | FALSE      | 0.71    | 0.61    | 0.11       | 0.018   |
| cg09794131 | <i>HYDIN</i>    | 16  | TRUE       | 0.34    | 0.23    | 0.11       | 0.030   |
| cg07747299 | <i>SPATC1L</i>  | 21  | TRUE       | 0.56    | 0.46    | 0.10       | 0.040   |
| cg06851207 | <i>FLJ10781</i> | 19  | TRUE       | 0.72    | 0.62    | 0.09       | 0.028   |
| cg06361108 | <i>CCNF</i>     | 16  | TRUE       | 0.21    | 0.13    | 0.09       | 0.009   |
| cg25902889 | <i>FSD1</i>     | 19  | FALSE      | 0.62    | 0.53    | 0.09       | 0.009   |
| cg17483510 | <i>GNB4</i>     | 3   | TRUE       | 0.45    | 0.36    | 0.08       | 0.011   |
| cg26764244 | <i>GNG12</i>    | 1   | TRUE       | 0.28    | 0.20    | 0.08       | 0.034   |
| cg16670497 | <i>GSTM2</i>    | 1   | TRUE       | 0.44    | 0.36    | 0.08       | 0.024   |
| cg17179881 | <i>BIK</i>      | 22  | TRUE       | 0.62    | 0.54    | 0.08       | 0.017   |
| cg12699145 | <i>TMC7</i>     | 16  | TRUE       | 0.29    | 0.21    | 0.08       | 0.009   |
| cg07404485 | <i>PON1</i>     | 7   | FALSE      | 0.38    | 0.31    | 0.08       | 0.002   |
| cg06268694 | <i>CELSR1</i>   | 22  | TRUE       | 0.30    | 0.23    | 0.07       | 0.026   |
| cg26577529 | <i>KRT6E</i>    | 12  | FALSE      | 0.73    | 0.65    | 0.07       | 0.016   |
| cg04557383 | <i>MT1H</i>     | 16  | TRUE       | 0.43    | 0.35    | 0.07       | 0.005   |
| cg19297232 | <i>SMPD3</i>    | 16  | TRUE       | 0.59    | 0.52    | 0.07       | 0.029   |
| cg22039287 | <i>RIT2</i>     | 18  | FALSE      | 0.61    | 0.53    | 0.07       | 0.006   |
| cg22609784 | <i>MSX1</i>     | 4   | TRUE       | 0.55    | 0.48    | 0.07       | 0.001   |
| cg07640473 | <i>SEMA3F</i>   | 3   | TRUE       | 0.51    | 0.44    | 0.07       | 0.029   |
| cg10447080 | <i>FILIP1</i>   | 6   | FALSE      | 0.37    | 0.30    | 0.07       | 0.012   |
| cg18055394 | <i>EPHA3</i>    | 3   | TRUE       | 0.34    | 0.27    | 0.07       | 0.041   |
| cg03283421 | <i>CUZD1</i>    | 10  | FALSE      | 0.72    | 0.65    | 0.07       | 0.034   |
| cg08137040 | <i>ZNF800</i>   | 7   | TRUE       | 0.35    | 0.28    | 0.07       | 0.003   |
| cg15534366 | <i>CDH4</i>     | 20  | FALSE      | 0.52    | 0.46    | 0.07       | 0.012   |
| cg00563926 | <i>TGFBR3</i>   | 1   | TRUE       | 0.27    | 0.21    | 0.06       | 0.047   |
| cg26525091 | <i>MADCAM1</i>  | 19  | TRUE       | 0.24    | 0.18    | 0.06       | 0.004   |
| cg00949442 | <i>ABCA3</i>    | 16  | TRUE       | 0.24    | 0.18    | 0.06       | 0.002   |
| cg06147863 | <i>SPI1</i>     | 11  | FALSE      | 0.67    | 0.61    | 0.06       | 0.001   |
| cg07914866 | <i>IRAK3</i>    | 12  | TRUE       | 0.33    | 0.27    | 0.06       | 0.010   |
| cg13391638 | <i>FLJ13576</i> | 7   | TRUE       | 0.41    | 0.35    | 0.06       | 0.028   |
| cg21974239 | <i>MAPK12</i>   | 22  | TRUE       | 0.22    | 0.16    | 0.06       | 0.007   |
| cg00489401 | <i>FLT4</i>     | 5   | TRUE       | 0.20    | 0.14    | 0.06       | 0.021   |
| cg15778232 | <i>PHB2</i>     | 12  | FALSE      | 0.63    | 0.57    | 0.06       | 0.019   |

|            |                 |    |       |      |      |       |       |
|------------|-----------------|----|-------|------|------|-------|-------|
| cg13975369 | <i>TSGA14</i>   | 7  | TRUE  | 0.32 | 0.26 | 0.06  | 0.010 |
| cg14620221 | <i>OR8B8</i>    | 11 | FALSE | 0.80 | 0.74 | 0.06  | 0.018 |
| cg08946332 | <i>ALOX12</i>   | 17 | TRUE  | 0.87 | 0.81 | 0.06  | 0.016 |
| cg27038439 | <i>MSX1</i>     | 4  | TRUE  | 0.75 | 0.70 | 0.06  | 0.044 |
| cg12499211 | <i>SH2D2A</i>   | 1  | TRUE  | 0.44 | 0.38 | 0.06  | 0.049 |
| cg24789869 | <i>DDX11</i>    | 12 | TRUE  | 0.12 | 0.07 | 0.06  | 0.001 |
| cg26069745 | <i>HOXA2</i>    | 7  | TRUE  | 0.25 | 0.19 | 0.06  | 0.021 |
| cg27063525 | <i>NUS1</i>     | 6  | TRUE  | 0.17 | 0.11 | 0.06  | 0.049 |
| cg03760483 | <i>ALOX12</i>   | 17 | TRUE  | 0.43 | 0.37 | 0.06  | 0.043 |
| cg18815943 | <i>FOXE3</i>    | 1  | TRUE  | 0.13 | 0.07 | 0.06  | 0.001 |
| cg07637239 | <i>KCNK18</i>   | 10 | FALSE | 0.52 | 0.46 | 0.06  | 0.018 |
| cg09328024 | <i>DYRK3</i>    | 1  | TRUE  | 0.28 | 0.22 | 0.06  | 0.022 |
| cg00043004 | <i>NOXO1</i>    | 16 | TRUE  | 0.16 | 0.11 | 0.06  | 0.006 |
| cg18501026 | <i>DOCK3</i>    | 3  | TRUE  | 0.23 | 0.17 | 0.06  | 0.002 |
| cg19777470 | <i>CRABP1</i>   | 15 | TRUE  | 0.25 | 0.20 | 0.06  | 0.013 |
| cg13707560 | <i>NME5</i>     | 5  | TRUE  | 0.42 | 0.37 | 0.05  | 0.026 |
| cg09606564 | <i>MFAP4</i>    | 17 | FALSE | 0.34 | 0.29 | 0.05  | 0.036 |
| cg19428417 | <i>RRAD</i>     | 16 | TRUE  | 0.52 | 0.47 | 0.05  | 0.025 |
| cg09238677 | <i>C3AR1</i>    | 12 | FALSE | 0.47 | 0.41 | 0.05  | 0.047 |
| cg00328227 | <i>C1orf59</i>  | 1  | TRUE  | 0.53 | 0.48 | 0.05  | 0.048 |
| cg16352283 | <i>FAM46B</i>   | 1  | TRUE  | 0.52 | 0.47 | 0.05  | 0.031 |
| cg21096915 | <i>MGC16291</i> | 10 | TRUE  | 0.17 | 0.22 | -0.05 | 0.013 |
| cg19149785 | <i>KLK8</i>     | 19 | TRUE  | 0.65 | 0.70 | -0.05 | 0.044 |
| cg16330965 | <i>SNAPC5</i>   | 15 | TRUE  | 0.23 | 0.28 | -0.05 | 0.012 |
| cg06690548 | <i>SLC7A11</i>  | 4  | TRUE  | 0.73 | 0.78 | -0.05 | 0.005 |
| cg13817266 | <i>HSPA6</i>    | 1  | TRUE  | 0.35 | 0.40 | -0.05 | 0.047 |
| cg02104644 | <i>SYT7</i>     | 11 | TRUE  | 0.11 | 0.16 | -0.05 | 0.046 |
| cg10735607 | <i>TMEM109</i>  | 11 | TRUE  | 0.48 | 0.53 | -0.05 | 0.013 |
| cg15619125 | <i>MAMDC4</i>   | 9  | FALSE | 0.44 | 0.49 | -0.05 | 0.037 |
| cg00754253 | <i>HRASLS5</i>  | 11 | FALSE | 0.33 | 0.38 | -0.05 | 0.035 |
| cg13823701 | <i>TNXB</i>     | 6  | FALSE | 0.27 | 0.33 | -0.05 | 0.049 |
| cg26125600 | <i>PF4V1</i>    | 4  | FALSE | 0.38 | 0.43 | -0.05 | 0.003 |
| cg26205432 | <i>PLN</i>      | 6  | FALSE | 0.56 | 0.61 | -0.05 | 0.032 |
| cg15784615 | <i>LTBR</i>     | 12 | FALSE | 0.22 | 0.27 | -0.05 | 0.013 |
| cg14861570 | <i>MMD</i>      | 17 | FALSE | 0.26 | 0.32 | -0.05 | 0.001 |
| cg09547190 | <i>C9orf89</i>  | 9  | TRUE  | 0.38 | 0.44 | -0.05 | 0.009 |
| cg23685580 | <i>CATSPER2</i> | 15 | TRUE  | 0.81 | 0.87 | -0.05 | 0.027 |
| cg18940763 | <i>XBP1</i>     | 22 | TRUE  | 0.13 | 0.19 | -0.05 | 0.013 |
| cg05341115 | <i>HYAL4</i>    | 7  | FALSE | 0.67 | 0.72 | -0.05 | 0.001 |

|            |                  |    |       |      |      |       |        |
|------------|------------------|----|-------|------|------|-------|--------|
| cg14532519 | <i>TCF20</i>     | 22 | FALSE | 0.58 | 0.63 | -0.05 | 0.019  |
| cg24603941 | <i>MIA2</i>      | 14 | FALSE | 0.51 | 0.57 | -0.05 | 0.023  |
| cg12815142 | <i>SPAG7</i>     | 17 | TRUE  | 0.30 | 0.36 | -0.05 | 0.037  |
| cg04991214 | <i>PFDN2</i>     | 1  | FALSE | 0.50 | 0.56 | -0.05 | 0.050  |
| cg14882700 | <i>OTOP1</i>     | 4  | TRUE  | 0.20 | 0.26 | -0.05 | 0.037  |
| cg06948408 | <i>TMEM125</i>   | 1  | TRUE  | 0.18 | 0.23 | -0.05 | 0.017  |
| cg18184219 | <i>CEP170</i>    | 1  | FALSE | 0.73 | 0.79 | -0.05 | 0.031  |
| cg02741177 | <i>PROL1</i>     | 4  | FALSE | 0.65 | 0.70 | -0.05 | 0.005  |
| cg03964111 | <i>LR8</i>       | 7  | FALSE | 0.17 | 0.22 | -0.05 | 0.003  |
| cg17122311 | <i>IL27</i>      | 16 | FALSE | 0.46 | 0.51 | -0.05 | 0.040  |
| cg10742801 | <i>PRAP1</i>     | 10 | FALSE | 0.29 | 0.34 | -0.05 | 0.006  |
| cg01035422 | <i>PLIN</i>      | 15 | FALSE | 0.70 | 0.76 | -0.05 | 0.018  |
| cg01895214 | <i>LOC654342</i> | 2  | TRUE  | 0.49 | 0.54 | -0.05 | 0.001  |
| cg01040850 | <i>MR1</i>       | 1  | FALSE | 0.53 | 0.59 | -0.05 | 0.046  |
| cg14851685 | <i>CYP4F22</i>   | 19 | FALSE | 0.60 | 0.65 | -0.05 | 0.036  |
| cg05507459 | <i>NXNL2</i>     | 9  | TRUE  | 0.29 | 0.34 | -0.05 | 0.001  |
| cg00135393 | <i>FGG</i>       | 4  | FALSE | 0.31 | 0.37 | -0.05 | 0.036  |
| cg25017250 | <i>APOC4</i>     | 19 | TRUE  | 0.28 | 0.34 | -0.05 | 0.038  |
| cg13431205 | <i>RB1</i>       | 13 | TRUE  | 0.51 | 0.57 | -0.05 | 0.039  |
| cg10574499 | <i>UNQ2446</i>   | 16 | FALSE | 0.28 | 0.34 | -0.06 | 0.037  |
| cg02655623 | <i>HSA277841</i> | 17 | FALSE | 0.61 | 0.67 | -0.06 | 0.003  |
| cg03894103 | <i>PREPL</i>     | 2  | FALSE | 0.70 | 0.76 | -0.06 | 0.033  |
| cg07514381 | <i>LRRC2</i>     | 3  | FALSE | 0.69 | 0.75 | -0.06 | 0.042  |
| cg14477619 | <i>NPC1L1</i>    | 7  | FALSE | 0.41 | 0.47 | -0.06 | 0.013  |
| cg04106785 | <i>CDK5R1</i>    | 17 | TRUE  | 0.32 | 0.37 | -0.06 | 0.010  |
| cg17229388 | <i>MGC35169</i>  | 13 | TRUE  | 0.70 | 0.76 | -0.06 | 0.022  |
| cg13849691 | <i>ACSL5</i>     | 10 | TRUE  | 0.78 | 0.84 | -0.06 | 0.050  |
| cg06048973 | <i>ACTC</i>      | 15 | FALSE | 0.50 | 0.55 | -0.06 | 0.044  |
| cg08137716 | <i>TTLL6</i>     | 17 | FALSE | 0.71 | 0.76 | -0.06 | 0.022  |
| cg24652919 | <i>WDR58</i>     | 16 | FALSE | 0.64 | 0.69 | -0.06 | 0.039  |
| cg20199333 | <i>F2</i>        | 11 | FALSE | 0.48 | 0.54 | -0.06 | 0.016  |
| cg24898863 | <i>S100A8</i>    | 1  | FALSE | 0.23 | 0.29 | -0.06 | 0.002  |
| cg20099806 | <i>CCDC47</i>    | 17 | FALSE | 0.25 | 0.31 | -0.06 | 0.004  |
| cg18294158 | <i>ORC5L</i>     | 7  | FALSE | 0.66 | 0.72 | -0.06 | 0.007  |
| cg15398520 | <i>LPAL2</i>     | 6  | FALSE | 0.35 | 0.41 | -0.06 | 0.027  |
| cg25677709 | <i>NDST1</i>     | 5  | FALSE | 0.50 | 0.56 | -0.06 | 0.016  |
| cg24269657 | <i>F7</i>        | 13 | FALSE | 0.41 | 0.46 | -0.06 | 0.006  |
| cg00466492 | <i>CTXN1</i>     | 19 | TRUE  | 0.76 | 0.81 | -0.06 | 0.025  |
| cg01484156 | <i>NCALD</i>     | 8  | FALSE | 0.34 | 0.40 | -0.06 | <0.001 |

|            |                  |    |       |      |      |       |       |
|------------|------------------|----|-------|------|------|-------|-------|
| cg20584011 | <i>ZDHHC11</i>   | 5  | TRUE  | 0.72 | 0.78 | -0.06 | 0.002 |
| cg16153267 | <i>RB1</i>       | 13 | TRUE  | 0.56 | 0.61 | -0.06 | 0.008 |
| cg22337624 | <i>DHX38</i>     | 16 | FALSE | 0.27 | 0.33 | -0.06 | 0.003 |
| cg06850526 | <i>MGC15523</i>  | 17 | TRUE  | 0.27 | 0.33 | -0.06 | 0.039 |
| cg18901980 | <i>KRT25A</i>    | 17 | FALSE | 0.68 | 0.74 | -0.06 | 0.003 |
| cg16639185 | <i>LGTN</i>      | 1  | TRUE  | 0.33 | 0.39 | -0.06 | 0.031 |
| cg10303487 | <i>DPYS</i>      | 8  | TRUE  | 0.07 | 0.13 | -0.06 | 0.033 |
| cg00579402 | <i>FUT6</i>      | 19 | FALSE | 0.52 | 0.58 | -0.06 | 0.034 |
| cg04837071 | <i>NOXA1</i>     | 9  | TRUE  | 0.53 | 0.59 | -0.06 | 0.033 |
| cg12694870 | <i>HPD</i>       | 12 | FALSE | 0.38 | 0.44 | -0.06 | 0.027 |
| cg07233761 | <i>ESM1</i>      | 5  | TRUE  | 0.27 | 0.33 | -0.06 | 0.031 |
| cg22171829 | <i>PDK4</i>      | 7  | TRUE  | 0.12 | 0.18 | -0.06 | 0.037 |
| cg15201291 | <i>CYP2C8</i>    | 10 | FALSE | 0.53 | 0.60 | -0.06 | 0.014 |
| cg05985767 | <i>ANPEP</i>     | 15 | TRUE  | 0.36 | 0.42 | -0.06 | 0.008 |
| cg07163603 | <i>HLA-A</i>     | 6  | FALSE | 0.34 | 0.40 | -0.06 | 0.032 |
| cg24920358 | <i>PPIE</i>      | 1  | TRUE  | 0.32 | 0.38 | -0.06 | 0.046 |
| cg03835296 | <i>SLC17A1</i>   | 6  | FALSE | 0.32 | 0.38 | -0.07 | 0.014 |
| cg12542604 | <i>ANKS1A</i>    | 6  | TRUE  | 0.14 | 0.20 | -0.07 | 0.020 |
| cg07745725 | <i>PSG3</i>      | 19 | FALSE | 0.55 | 0.62 | -0.07 | 0.008 |
| cg02523400 | <i>SERPIND1</i>  | 22 | FALSE | 0.34 | 0.40 | -0.07 | 0.048 |
| cg24792360 | <i>FUCA1</i>     | 1  | TRUE  | 0.34 | 0.41 | -0.07 | 0.011 |
| cg27420123 | <i>FSHB</i>      | 11 | FALSE | 0.34 | 0.41 | -0.07 | 0.007 |
| cg23834593 | <i>HNF4A</i>     | 20 | FALSE | 0.37 | 0.44 | -0.07 | 0.029 |
| cg10414946 | <i>MS4A2</i>     | 11 | FALSE | 0.47 | 0.54 | -0.07 | 0.020 |
| cg07150830 | <i>NOS2A</i>     | 17 | FALSE | 0.52 | 0.59 | -0.07 | 0.020 |
| cg25514304 | <i>PSEN2</i>     | 1  | FALSE | 0.42 | 0.49 | -0.07 | 0.041 |
| cg15783800 | <i>HAK</i>       | 18 | TRUE  | 0.36 | 0.43 | -0.07 | 0.007 |
| cg27440834 | <i>SNX4</i>      | 3  | FALSE | 0.56 | 0.63 | -0.07 | 0.038 |
| cg02735486 | <i>ANK2</i>      | 4  | TRUE  | 0.46 | 0.53 | -0.07 | 0.030 |
| cg15149645 | <i>P8</i>        | 16 | FALSE | 0.17 | 0.24 | -0.07 | 0.003 |
| cg13614083 | <i>KCNAB2</i>    | 1  | TRUE  | 0.51 | 0.58 | -0.07 | 0.032 |
| cg12003230 | <i>LINC00313</i> | 21 | FALSE | 0.48 | 0.55 | -0.07 | 0.017 |
| cg02399455 | <i>SRI</i>       | 7  | FALSE | 0.54 | 0.61 | -0.07 | 0.025 |
| cg15357639 | <i>OGG1</i>      | 3  | TRUE  | 0.78 | 0.85 | -0.07 | 0.013 |
| cg07109801 | <i>NDUFAF3</i>   | 3  | TRUE  | 0.50 | 0.57 | -0.07 | 0.018 |
| cg19464944 | <i>FCGR1A</i>    | 1  | FALSE | 0.31 | 0.39 | -0.07 | 0.038 |
| cg20615832 | <i>PF4V1</i>     | 4  | TRUE  | 0.28 | 0.35 | -0.07 | 0.022 |
| cg23322523 | <i>TRIM55</i>    | 8  | FALSE | 0.26 | 0.33 | -0.07 | 0.013 |
| cg05976325 | <i>LOC284912</i> | 22 | FALSE | 0.51 | 0.58 | -0.07 | 0.038 |

|            |                  |    |       |      |      |       |        |
|------------|------------------|----|-------|------|------|-------|--------|
| cg13520715 | <i>LINC00479</i> | 21 | FALSE | 0.70 | 0.77 | -0.07 | 0.022  |
| cg25657700 | <i>SNRPN</i>     | 15 | TRUE  | 0.54 | 0.62 | -0.07 | 0.026  |
| cg04994456 | <i>RNF186</i>    | 1  | FALSE | 0.40 | 0.48 | -0.08 | 0.010  |
| cg19554294 | <i>VN1R2</i>     | 19 | FALSE | 0.51 | 0.58 | -0.08 | 0.010  |
| cg18429742 | <i>ZDHHC11</i>   | 5  | TRUE  | 0.64 | 0.72 | -0.08 | 0.016  |
| cg13705284 | <i>ACOX2</i>     | 3  | FALSE | 0.19 | 0.27 | -0.08 | 0.012  |
| cg13726463 | <i>COX6A2</i>    | 16 | TRUE  | 0.51 | 0.58 | -0.08 | 0.004  |
| cg26955850 | <i>OXT</i>       | 20 | TRUE  | 0.37 | 0.45 | -0.08 | 0.050  |
| cg04662594 | <i>EPB49</i>     | 8  | FALSE | 0.32 | 0.40 | -0.08 | 0.002  |
| cg20131968 | <i>CCDC47</i>    | 17 | FALSE | 0.33 | 0.42 | -0.08 | 0.020  |
| cg03743584 | <i>PRAP1</i>     | 10 | FALSE | 0.19 | 0.27 | -0.08 | 0.003  |
| cg06784466 | <i>FPRL2</i>     | 19 | FALSE | 0.39 | 0.48 | -0.08 | 0.008  |
| cg11108890 | <i>VAMP5</i>     | 2  | TRUE  | 0.10 | 0.18 | -0.08 | 0.040  |
| cg26631477 | <i>GPR125</i>    | 4  | TRUE  | 0.19 | 0.27 | -0.08 | <0.001 |
| cg02142461 | <i>LYAR</i>      | 4  | FALSE | 0.72 | 0.80 | -0.08 | 0.013  |
| cg03533858 | <i>MORN1</i>     | 1  | FALSE | 0.43 | 0.51 | -0.08 | 0.029  |
| cg08510456 | <i>BSN</i>       | 3  | TRUE  | 0.39 | 0.47 | -0.08 | 0.039  |
| cg06194808 | <i>MGC9712</i>   | 7  | FALSE | 0.48 | 0.57 | -0.09 | 0.008  |
| cg25598083 | <i>ACOT2</i>     | 14 | FALSE | 0.48 | 0.57 | -0.09 | 0.025  |
| cg07251788 | <i>CLTCL1</i>    | 22 | TRUE  | 0.42 | 0.51 | -0.09 | 0.028  |
| cg18678121 | <i>SEC61A2</i>   | 10 | TRUE  | 0.50 | 0.60 | -0.09 | 0.011  |
| cg03733371 | <i>LIPH</i>      | 3  | FALSE | 0.44 | 0.54 | -0.10 | 0.047  |
| cg02192965 | <i>SLC3A1</i>    | 2  | FALSE | 0.60 | 0.70 | -0.10 | 0.023  |
| cg24333473 | <i>ZNF597</i>    | 16 | TRUE  | 0.37 | 0.47 | -0.10 | 0.042  |
| cg17264470 | <i>FGF21</i>     | 19 | FALSE | 0.76 | 0.87 | -0.11 | 0.016  |
| cg22730830 | <i>PRSS21</i>    | 16 | TRUE  | 0.57 | 0.68 | -0.11 | 0.003  |
| cg24362726 | <i>C4orf33</i>   | 4  | FALSE | 0.31 | 0.42 | -0.11 | 0.039  |
| cg01600189 | <i>FLJ20444</i>  | 9  | TRUE  | 0.18 | 0.30 | -0.11 | 0.005  |
| cg24092914 | <i>VHL</i>       | 3  | TRUE  | 0.46 | 0.58 | -0.12 | 0.021  |
| cg26267561 | <i>OXT</i>       | 20 | TRUE  | 0.68 | 0.84 | -0.15 | 0.001  |
| cg20655558 | <i>DNAJB7</i>    | 22 | FALSE | 0.56 | 0.72 | -0.16 | 0.035  |
| cg23349790 | <i>IGSF21</i>    | 1  | TRUE  | 0.12 | 0.30 | -0.18 | <0.001 |

**Table S5 . Gene ontology enrichment analysis using the genes with DMCs in SAT**

| <b>GO term</b>                                        | <b>Fold enrichment</b> | <b>Count</b> | <b>p value</b> | <b>Genes</b>                                           |
|-------------------------------------------------------|------------------------|--------------|----------------|--------------------------------------------------------|
| Regulation of cellular ketone metabolic process       | 22.1                   | 4            | 0.001          | <i>LEP, CPT1B, IRS1, ADIPOQ</i>                        |
| Regulation of carbohydrate biosynthetic process       | 44.9                   | 3            | 0.002          | <i>LEP, IRS1, ADIPOQ</i>                               |
| Muscle organ development                              | 7.5                    | 5            | 0.004          | <i>CPT1B, TSC1, MYF5, SGCD, ALX4</i>                   |
| Regulation of lipid metabolic process                 | 11.2                   | 4            | 0.005          | <i>LEP, CPT1B, IRS1, ADIPOQ</i>                        |
| Regulation of glucose metabolic process               | 27                     | 3            | 0.005          | <i>LEP, IRS1, ADIPOQ</i>                               |
| Fatty acid catabolic process                          | 26.2                   | 3            | 0.006          | <i>LEP, CPT1B, ADIPOQ</i>                              |
| Regulation of cellular carbohydrate metabolic process | 24.8                   | 3            | 0.006          | <i>LEP, IRS1, ADIPOQ</i>                               |
| Regulation of carbohydrate metabolic process          | 24.2                   | 3            | 0.006          | <i>LEP, IRS1, ADIPOQ</i>                               |
| Regulation of fatty acid metabolic process            | 19.3                   | 3            | 0.010          | <i>CPT1B, IRS1, ADIPOQ</i>                             |
| Embryonic skeletal system morphogenesis               | 16.6                   | 3            | 0.013          | <i>HOXA4, MYF5, ALX4</i>                               |
| Skeletal system development                           | 4.9                    | 5            | 0.017          | <i>HOXA4, CLEC3A, KAZALD1, MYF5, ALX4</i>              |
| Development of primary female sexual characteristics  | 13.7                   | 3            | 0.019          | <i>LEP, FGF7, FANCG</i>                                |
| Cell adhesion                                         | 3.1                    | 7            | 0.020          | <i>TSC1, MYF5, SIGLEC7, LGALS7, NINJ2, CTNNA1, DST</i> |
| Biological adhesion                                   | 3.1                    | 7            | 0.020          | <i>TSC1, MYF5, SIGLEC7, LGALS7, NINJ2, CTNNA1, DST</i> |
| Cellular lipid catabolic process                      | 12.4                   | 3            | 0.023          | <i>LEP, CPT1B, ADIPOQ</i>                              |
| Regulation of gluconeogenesis                         | 78.7                   | 2            | 0.025          | <i>LEP, ADIPOQ</i>                                     |
| Negative regulation of response to stimulus           | 9.4                    | 3            | 0.038          | <i>LEP, IRS1, ADIPOQ</i>                               |
| Response to insulin stimulus                          | 9.4                    | 3            | 0.038          | <i>LEP, TSC1, IRS1</i>                                 |
| Phosphatidylcholine biosynthetic process              | 44.9                   | 2            | 0.043          | <i>CPT1B, FGF7</i>                                     |
| Organic acid catabolic process                        | 8.5                    | 3            | 0.046          | <i>LEP, CPT1B, ADIPOQ</i>                              |
| Carboxylic acid catabolic process                     | 8.5                    | 3            | 0.046          | <i>LEP, CPT1B, ADIPOQ</i>                              |
| Skeletal system morphogenesis                         | 8.4                    | 3            | 0.047          | <i>HOXA4, MYF5, ALX4</i>                               |

**Table S6 . Gene ontology enrichment analysis using the genes with DMCs in VAT**

| <b>GO term</b>                                    | <b>Fold enrichment</b> | <b>Count</b> | <b>p value</b> | <b>Genes</b>                                                                                                                                                                |
|---------------------------------------------------|------------------------|--------------|----------------|-----------------------------------------------------------------------------------------------------------------------------------------------------------------------------|
| Regulation of apoptosis                           | 1.9                    | 26           | 0.003          | <i>DCC, MEF2C, ADA, TGFB2, EDNRB, ATG5, PAX7, GRID2, TNFRSF19, MYC, TERT, ERCC1, FGD4, CD3E, SKP2, TRIO, HGF, CSDA, YWHAE, BRCA1, JMY, KCNH8, IL12B, TIAF1, PDCD7, DNM2</i> |
| Regulation of programmed cell death               | 1.9                    | 26           | 0.003          | <i>DCC, MEF2C, ADA, TGFB2, EDNRB, ATG5, PAX7, GRID2, TNFRSF19, MYC, TERT, ERCC1, FGD4, CD3E, SKP2, TRIO, HGF, CSDA, YWHAE, BRCA1, JMY, KCNH8, IL12B, TIAF1, PDCD7, DNM2</i> |
| Regulation of cell death                          | 1.9                    | 26           | 0.003          | <i>DCC, MEF2C, ADA, TGFB2, EDNRB, ATG5, PAX7, GRID2, TNFRSF19, MYC, TERT, ERCC1, FGD4, CD3E, SKP2, TRIO, HGF, CSDA, YWHAE, BRCA1, JMY, KCNH8, IL12B, TIAF1, PDCD7, DNM2</i> |
| Negative regulation of lyase activity             | 5.3                    | 5            | 0.014          | <i>EDNRB, GRM3, ADCY7, GALR1, GRM6</i>                                                                                                                                      |
| Negative regulation of adenylate cyclase activity | 5.3                    | 5            | 0.014          | <i>EDNRB, GRM3, ADCY7, GALR1, GRM6</i>                                                                                                                                      |
| Negative regulation of cyclase activity           | 5.3                    | 5            | 0.014          | <i>EDNRB, GRM3, ADCY7, GALR1, GRM6</i>                                                                                                                                      |
| Negative regulation of neuron differentiation     | 7.1                    | 4            | 0.018          | <i>PHOX2B, FOXA2, DLL1, ASPM</i>                                                                                                                                            |
| Negative regulation of apoptosis                  | 2.1                    | 13           | 0.019          | <i>MEF2C, SKP2, HGF, CSDA, ADA, EDNRB, ATG5, PAX7, KCNH8, TIAF1, MYC, ERCC1, TERT</i>                                                                                       |
| DNA catabolic process                             | 4.9                    | 5            | 0.019          | <i>GTF2H4, DNASE1L2, MYC, XRN2, ERCC1</i>                                                                                                                                   |
| Negative regulation of programmed cell death      | 2.1                    | 13           | 0.02           | <i>MEF2C, SKP2, HGF, CSDA, ADA, EDNRB, ATG5, PAX7, KCNH8, TIAF1, MYC, ERCC1, TERT</i>                                                                                       |
| Negative regulation of cell death                 | 2.1                    | 13           | 0.021          | <i>MEF2C, SKP2, HGF, CSDA, ADA, EDNRB, ATG5, PAX7, KCNH8, TIAF1, MYC, ERCC1, TERT</i>                                                                                       |
| Regulation of adenylate cyclase activity          | 3.6                    | 6            | 0.024          | <i>EDNRB, GRM3, ADCY7, GALR1, GRM6, GNAS</i>                                                                                                                                |
| Regulation of cell cycle                          | 2.1                    | 12           | 0.027          | <i>E2F1, CCNT2, SKP2, RPRM, BRIP1, NUSAP1, HERC2, CHFR, PKIA, MYC, BRCA1, TGFB2</i>                                                                                         |
| Regulation of cyclase activity                    | 3.5                    | 6            | 0.027          | <i>EDNRB, GRM3, ADCY7, GALR1, GRM6, GNAS</i>                                                                                                                                |
| Regulation of camp biosynthetic process           | 3.5                    | 6            | 0.029          | <i>EDNRB, GRM3, ADCY7, GALR1, GRM6, GNAS</i>                                                                                                                                |
| Regulation of lyase activity                      | 3.5                    | 6            | 0.029          | <i>EDNRB, GRM3, ADCY7, GALR1, GRM6, GNAS</i>                                                                                                                                |
| Regulation of camp metabolic process              | 3.4                    | 6            | 0.032          | <i>EDNRB, GRM3, ADCY7, GALR1, GRM6, GNAS</i>                                                                                                                                |

|                                                      |      |    |       |                                                                                                                                               |
|------------------------------------------------------|------|----|-------|-----------------------------------------------------------------------------------------------------------------------------------------------|
| Positive regulation of apoptosis                     | 1.9  | 14 | 0.033 | <i>DCC, CD3E, SKP2, TRIO, YWHAE, BRCA1, TGFB2, JMY, TNFRSF19, IL12B, MYC, PDCD7, DNM2, FGD4</i>                                               |
| Hepatocyte growth factor receptor signaling pathway  | 58.3 | 2  | 0.034 | <i>MET, HGF</i>                                                                                                                               |
| Positive regulation of programmed cell death         | 1.9  | 14 | 0.035 | <i>DCC, CD3E, SKP2, TRIO, YWHAE, BRCA1, TGFB2, JMY, TNFRSF19, IL12B, MYC, PDCD7, DNM2, FGD4</i>                                               |
| Positive regulation of cell death                    | 1.9  | 14 | 0.036 | <i>DCC, CD3E, SKP2, TRIO, YWHAE, BRCA1, TGFB2, JMY, TNFRSF19, IL12B, MYC, PDCD7, DNM2, FGD4</i>                                               |
| Lymphocyte activation during immune response         | 9.7  | 3  | 0.037 | <i>RELB, IL12B, ADA</i>                                                                                                                       |
| Cell death                                           | 1.6  | 20 | 0.039 | <i>E2F1, MEF2C, DCC, TAOK2, FGF14, TRIO, YWHAE, BRCA1, RRAGC, TGFB2, ATXN2, BNIPL, RASSF5, APOL1, ATG5, TNFRSF19, TIAF1, MYC, PDCD7, FGD4</i> |
| Regulation of nucleotide biosynthetic process        | 3.2  | 6  | 0.04  | <i>EDNRB, GRM3, ADCY7, GALR1, GRM6, GNAS</i>                                                                                                  |
| Regulation of cyclic nucleotide biosynthetic process | 3.2  | 6  | 0.04  | <i>EDNRB, GRM3, ADCY7, GALR1, GRM6, GNAS</i>                                                                                                  |
| Death                                                | 1.6  | 20 | 0.042 | <i>E2F1, MEF2C, DCC, TAOK2, FGF14, TRIO, YWHAE, BRCA1, RRAGC, TGFB2, ATXN2, BNIPL, RASSF5, APOL1, ATG5, TNFRSF19, TIAF1, MYC, PDCD7, FGD4</i> |
| Regulation of cyclic nucleotide metabolic process    | 3.1  | 6  | 0.044 | <i>EDNRB, GRM3, ADCY7, GALR1, GRM6, GNAS</i>                                                                                                  |
| Cell migration                                       | 2.1  | 10 | 0.047 | <i>DCC, PHOX2B, EDNRB, TAOK2, MET, ENPEP, IL12B, SRF, YWHAE, TGFB2</i>                                                                        |
| Second-messenger-mediated signaling                  | 2.2  | 9  | 0.048 | <i>EDNRB, P2RY6, HRH1, ADCY7, GALR1, GRM6, HIST1H4E, GNAS, FEN1</i>                                                                           |
| Regulation of nucleotide metabolic process           | 3    | 6  | 0.049 | <i>EDNRB, GRM3, ADCY7, GALR1, GRM6, GNAS</i>                                                                                                  |
| Regulation of survival gene product expression       | 8.3  | 3  | 0.049 | <i>MEF2C, SKP2, MYC</i>                                                                                                                       |



**Table S7 . Gene ontology enrichment analysis using the genes with DMCs in LT**

| <b>GO term</b>                                               | <b>Fold Enrichment</b> | <b>Count</b> | <b>p value</b> | <b>Genes</b>                                                                                   |
|--------------------------------------------------------------|------------------------|--------------|----------------|------------------------------------------------------------------------------------------------|
| Response to wounding                                         | 2.9                    | 13           | 0.002          | <i>C3AR1, KLK8, S100A8, NDST1, IL27, F7, SYT7, EPHA3, FGG, HNF4A, F2, MS4A2, SERPIND1</i>      |
| Regulation of cell growth                                    | 4.2                    | 7            | 0.006          | <i>HNF4A, SEMA3F, RB1, ESM1, GREM1, CDH4, ALOX12</i>                                           |
| Regulation of body fluid levels                              | 5                      | 6            | 0.007          | <i>FGG, HNF4A, OXT, F2, SERPIND1, F7</i>                                                       |
| Regulation of cell size                                      | 4                      | 7            | 0.008          | <i>HNF4A, SEMA3F, TGFBR3, RB1, GREM1, CDH4, ALOX12</i>                                         |
| Regulation of cellular component size                        | 3.4                    | 8            | 0.008          | <i>HNF4A, SEMA3F, TGFBR3, RB1, EPB49, GREM1, CDH4, ALOX12</i>                                  |
| Blood coagulation                                            | 5.7                    | 5            | 0.011          | <i>FGG, HNF4A, F2, SERPIND1, F7</i>                                                            |
| Coagulation                                                  | 5.7                    | 5            | 0.011          | <i>FGG, HNF4A, F2, SERPIND1, F7</i>                                                            |
| Homeostatic process                                          | 2.2                    | 14           | 0.011          | <i>SRI, C3AR1, OXT, CCDC47, RB1, EPHA3, HNF4A, APOC4, PLN, F2, NPC1L1, TGFBR3, DYRK3, MT1H</i> |
| Hemostasis                                                   | 5.4                    | 5            | 0.013          | <i>FGG, HNF4A, F2, SERPIND1, F7</i>                                                            |
| Regulation of homeostatic process                            | 5.1                    | 5            | 0.016          | <i>KLK8, OXT, F2, SPI1, MS4A2</i>                                                              |
| Di-, tri-valent inorganic cation homeostasis                 | 3.4                    | 7            | 0.016          | <i>SRI, C3AR1, OXT, PLN, F2, CCDC47, MT1H</i>                                                  |
| Superoxide metabolic process                                 | 14                     | 3            | 0.019          | <i>NOXO1, NOXA1, ALOX12</i>                                                                    |
| Wound healing                                                | 3.7                    | 6            | 0.023          | <i>FGG, HNF4A, F2, SERPIND1, F7, SYT7</i>                                                      |
| Regulation of nervous system development                     | 3.6                    | 6            | 0.024          | <i>HOXA2, CDK5R1, KLK8, SEMA3F, OXT, CDH4</i>                                                  |
| Regulation of cell morphogenesis                             | 4.5                    | 5            | 0.025          | <i>KLK8, SEMA3F, TGFBR3, FBLIM1, CDH4</i>                                                      |
| Regulation of neuron differentiation                         | 4.4                    | 5            | 0.027          | <i>HOXA2, CDK5R1, KLK8, SEMA3F, CDH4</i>                                                       |
| Regulation of cell morphogenesis involved in differentiation | 6.1                    | 4            | 0.028          | <i>KLK8, SEMA3F, TGFBR3, CDH4</i>                                                              |
| Chemical homeostasis                                         | 2.3                    | 10           | 0.030          | <i>SRI, C3AR1, HNF4A, APOC4,</i>                                                               |

|                                                        |      |   |       |                                                  |
|--------------------------------------------------------|------|---|-------|--------------------------------------------------|
|                                                        |      |   |       | <i>OXT, PLN, F2, NPC1L1, CCDC47, MT1H</i>        |
| Regulation of cell development                         | 3.4  | 6 | 0.031 | <i>HOXA2, CDK5R1, KLK8, SEMA3F, TGFBR3, CDH4</i> |
| Negative regulation of cellular component organization | 4.1  | 5 | 0.033 | <i>IRAK3, KLK8, SEMA3F, TGFBR3, EPB49</i>        |
| Calcium ion transport                                  | 4.1  | 5 | 0.033 | <i>SRI, CATSPER2, PLN, F2, PSEN2</i>             |
| Response to prostaglandin stimulus                     | 58.3 | 2 | 0.034 | <i>OXT, TGFBR3</i>                               |
| Response to prostaglandin E stimulus                   | 58.3 | 2 | 0.034 | <i>OXT, TGFBR3</i>                               |
| Muscle organ development                               | 3.3  | 6 | 0.034 | <i>SRI, MSX1, MAPK12, PLN, VAMP5, TGFBR3</i>     |
| Cation homeostasis                                     | 2.9  | 7 | 0.035 | <i>SRI, C3AR1, OXT, PLN, F2, CCDC47, MT1H</i>    |
| Negative regulation of cell growth                     | 5.1  | 4 | 0.044 | <i>HNF4A, SEMA3F, RB1, GREM1</i>                 |
| Cellular di-, tri-valent inorganic cation homeostasis  | 3.1  | 6 | 0.044 | <i>SRI, C3AR1, OXT, PLN, F2, MT1H</i>            |
| Myeloid cell differentiation                           | 5    | 4 | 0.045 | <i>PSEN2, TGFBR3, DYRK3, RB1</i>                 |

**Table S8. Differential gene expression in WB in the comparison between DO and NDO groups**

| <b>Symbol</b>       | <b>Accession</b> | <b>logFC</b> | <b>p value</b> |
|---------------------|------------------|--------------|----------------|
| <i>RAP1GAP</i>      | NM_002885.1      | 1.430        | 0.001          |
| <i>UTS2</i>         | NM_006786.2      | 1.307        | 0.009          |
| <i>AMFR</i>         | NM_001144.4      | 1.245        | 0.020          |
| <i>NFIX</i>         | NM_002501.2      | 1.175        | 0.023          |
| <i>LOC100131164</i> | XM_001721919.1   | 1.160        | 0.002          |
| <i>MCOLN1</i>       | NM_020533.1      | 1.152        | <0.001         |
| <i>C16ORF35</i>     | NM_001039476.1   | 1.126        | <0.001         |
| <i>RNF182</i>       | NM_152737.2      | 1.101        | 0.001          |
| <i>SLC4A1</i>       | NM_000342.2      | 1.096        | <0.001         |
| <i>HSPC157</i>      | NR_023918.1      | 1.068        | 0.037          |
| <i>SOCS1</i>        | NM_003745.1      | 1.064        | 0.008          |
| <i>KRT1</i>         | NM_006121.3      | 1.004        | 0.001          |
| <i>USF1</i>         | NM_007122.3      | 0.993        | 0.013          |

|                     |                |        |        |
|---------------------|----------------|--------|--------|
| <i>UTS2</i>         | NM_021995.1    | 0.969  | 0.043  |
| <i>C17ORF97</i>     | NM_001013672.3 | 0.948  | 0.045  |
| <i>ZDHHC19</i>      | NM_001039617.1 | 0.912  | 0.001  |
| <i>C16ORF35</i>     | NM_012075.1    | 0.899  | <0.001 |
| <i>RBM38</i>        | NM_017495.4    | 0.880  | 0.029  |
| <i>CMBL</i>         | NM_138809.3    | 0.853  | 0.032  |
| <i>VWCE</i>         | NM_152718.2    | 0.841  | 0.005  |
| <i>LOC100128714</i> | XM_001722756.1 | 0.833  | <0.001 |
| <i>TSTA3</i>        | NM_003313.2    | 0.828  | 0.001  |
| <i>NR1D1</i>        | NM_021724.2    | 0.827  | 0.002  |
| <i>TMEM86B</i>      | NM_173804.3    | 0.827  | 0.005  |
| <i>ACSL6</i>        | NM_001009185.1 | 0.823  | <0.001 |
| <i>TRIM58</i>       | NM_015431.3    | 0.821  | 0.002  |
| <i>SCARNA17</i>     | NR_003003.2    | 0.820  | <0.001 |
| <i>PLEK2</i>        | NM_016445.1    | 0.813  | 0.007  |
| <i>SLC6A10P</i>     | NR_003083.2    | 0.810  | 0.010  |
| <i>SLC22A16</i>     | NM_033125.2    | -0.843 | 0.001  |
| <i>NAPSA</i>        | NM_004851.1    | -0.849 | 0.020  |
| <i>LACTB2</i>       | NM_016027.1    | -0.870 | 0.001  |
| <i>LOC653071</i>    | XM_930721.1    | -0.885 | 0.006  |
| <i>ODF2L</i>        | NM_001007022.1 | -0.893 | 0.003  |
| <i>SPAST</i>        | NM_199436.1    | -0.935 | 0.000  |
| <i>ORM2</i>         | NM_000608.2    | -0.975 | <0.001 |
| <i>COPG2</i>        | NM_012133.2    | -0.977 | 0.005  |
| <i>NKX3-1</i>       | NM_006167.2    | -0.988 | 0.002  |
| <i>LOC283547</i>    | XM_378454.3    | -1.007 | <0.001 |
| <i>PLCB1</i>        | NM_015192.2    | -1.013 | 0.004  |
| <i>ORM1</i>         | NM_000607.1    | -1.067 | 0.050  |
| <i>MFF</i>          | NM_020194.4    | -1.273 | 0.040  |
| <i>LOC253039</i>    | NR_024408.1    | -1.348 | 0.002  |

**Table S9. Differential gene expression in SAT in the comparison between DO and NDO groups**

| <b>Symbol</b>    | <b>Accession</b> | <b>logFC</b> | <b>p value</b> |
|------------------|------------------|--------------|----------------|
| <i>CCL20</i>     | NM_004591.1      | 1.310        | 0.032          |
| <i>SLAMF1</i>    | NM_003037.1      | 1.068        | 0.034          |
| <i>AMFR</i>      | NM_001144.4      | 0.955        | 0.005          |
| <i>PTX3</i>      | NM_002852.2      | 0.937        | 0.035          |
| <i>ACTA1</i>     | NM_001100.3      | 0.862        | 0.013          |
| <i>LIPG</i>      | NM_006033.2      | 0.831        | 0.021          |
| <i>TNC</i>       | NM_002160.2      | 0.828        | 0.011          |
| <i>EDN1</i>      | NM_001955.2      | 0.815        | 0.018          |
| <i>SERPINA3</i>  | NM_001085.4      | 0.809        | 0.026          |
| <i>LOC645313</i> | XR_017585.2      | -0.829       | 0.026          |
| <i>MS4A4A</i>    | NM_148975.1      | -0.829       | 0.003          |
| <i>ITGB1BP1</i>  | NM_022334.3      | -0.854       | 0.020          |
| <i>MIR1974</i>   | NR_031738.1      | -0.966       | 0.011          |
| <i>SEL1L2</i>    | NM_025229.1      | -1.032       | 0.004          |
| <i>STMN2</i>     | NM_007029.2      | -1.127       | <0.001         |
| <i>LOC644936</i> | NR_004845.1      | -1.164       | 0.016          |
| <i>STMN2</i>     | NM_007029.2      | -1.333       | <0.001         |

**Table S10. Differential gene expression in VAT in the comparison between DO and NDO groups**

| <b>Symbol</b>    | <b>Accession</b> | <b>logFC</b> | <b>p value</b> |
|------------------|------------------|--------------|----------------|
| <i>AMFR</i>      | NM_001144.4      | 1.149        | 0.034          |
| <i>G3BP2</i>     | NM_203504.1      | 1.020        | 0.021          |
| <i>G3BP2</i>     | NM_203504.1      | 0.829        | 0.022          |
| <i>GZMH</i>      | NM_033423.3      | -0.832       | <0.001         |
| <i>RNU1A3</i>    | NR_004430.1      | -0.860       | 0.028          |
| <i>DHRS9</i>     | NM_005771.3      | -0.860       | 0.036          |
| <i>LOC648984</i> | XM_938063.1      | -0.868       | <0.001         |
| <i>CCL18</i>     | NM_002988.2      | -0.884       | 0.037          |
| <i>NR4A3</i>     | NM_173199.1      | -0.996       | 0.006          |
| <i>ACP5</i>      | NM_001611.2      | -1.011       | 0.011          |
| <i>RNU1-3</i>    | NR_004408.1      | -1.015       | 0.046          |
| <i>ALAS2</i>     | NM_001037968.1   | -1.047       | 0.009          |
| <i>HBE1</i>      | NM_005330.3      | -1.070       | 0.004          |
| <i>RNU1G2</i>    | NR_004426.1      | -1.081       | 0.038          |
| <i>RNU1-5</i>    | NR_004400.1      | -1.088       | 0.028          |
| <i>HSPA1B</i>    | NM_005346.3      | -1.100       | 0.034          |
| <i>DEFB1</i>     | NM_005218.3      | -1.133       | 0.012          |
| <i>KLF4</i>      | NM_004235.3      | -1.225       | 0.038          |
| <i>KLF4</i>      | NM_004235.3      | -1.366       | 0.044          |
| <i>JUN</i>       | NM_002228.3      | -1.389       | 0.031          |
| <i>LOC644936</i> | NR_004845.1      | -1.402       | 0.037          |
| <i>HBD</i>       | NM_000519.3      | -1.443       | 0.001          |
| <i>NR4A2</i>     | NM_006186.2      | -1.547       | 0.034          |
| <i>HBA1</i>      | NM_000558.3      | -1.731       | 0.006          |
| <i>LOC731682</i> | XM_001129369.1   | -1.877       | 0.010          |
| <i>HBG2</i>      | NM_000184.2      | -1.899       | 0.001          |
| <i>HBG1</i>      | NM_000559.2      | -2.020       | 0.001          |
| <i>FOS</i>       | NM_005252.2      | -2.757       | 0.021          |
| <i>FOSB</i>      | NM_006732.1      | -3.175       | 0.024          |

**Table S11. Differential gene expression in LT in the comparison between DO and NDO groups**

| Symbol              | Accession      | logFC  | p value |
|---------------------|----------------|--------|---------|
| <i>HLA-DRB1</i>     | NM_002124.1    | 1.447  | 0.043   |
| <i>PLA2G2A</i>      | NM_000300.2    | 1.179  | 0.026   |
| <i>LOC729708</i>    | XM_001725700.1 | -1.053 | 0.039   |
| <i>LOC100132564</i> | XM_001713808.1 | -1.091 | 0.049   |

**Table S12. List of genes with correlation between alteration of DNA methylation and differential gene expression in WB**

| Symbol          | Target ID  | Delta Beta | p value (Delta Beta) | log FC | p value (logFC) |
|-----------------|------------|------------|----------------------|--------|-----------------|
| <i>BRDT</i>     | cg14732540 | 0.086      | 0.008                | -0.132 | 0.007           |
| <i>PSG6</i>     | cg11151665 | 0.064      | <0.001               | -0.125 | 0.029           |
| <i>PPP2R2D</i>  | cg21750602 | 0.039      | 0.044                | -0.196 | 0.029           |
| <i>GPR175</i>   | cg13728650 | 0.031      | 0.006                | -0.193 | 0.037           |
| <i>KRT13</i>    | cg10742225 | 0.027      | 0.017                | -0.132 | 0.015           |
| <i>C21orf94</i> | cg17266238 | 0.025      | 0.032                | -0.140 | 0.047           |
| <i>PSG6</i>     | cg17642353 | 0.022      | 0.040                | -0.125 | 0.029           |
| <i>HBQ1</i>     | cg17714030 | 0.019      | 0.008                | -0.570 | 0.001           |
| <i>HBD</i>      | cg20609368 | 0.016      | 0.041                | -1.443 | 0.001           |
| <i>SLC7A6OS</i> | cg27077685 | 0.010      | 0.025                | -0.283 | 0.024           |
| <i>STEAP3</i>   | cg04749104 | 0.010      | 0.038                | -0.176 | 0.010           |
| <i>THSD1</i>    | cg16114640 | 0.009      | 0.013                | -0.169 | 0.004           |
| <i>PRMT2</i>    | cg06725035 | 0.008      | 0.018                | -0.295 | 0.007           |
| <i>ASAH1</i>    | cg13563405 | -0.004     | 0.048                | 0.164  | 0.004           |
| <i>TTC9C</i>    | cg24515202 | -0.004     | 0.027                | 0.195  | 0.049           |
| <i>APBA1</i>    | cg15840658 | -0.005     | 0.037                | 0.138  | 0.037           |
| <i>APBA1</i>    | cg15623573 | -0.005     | 0.048                | 0.138  | 0.037           |
| <i>BCKDHB</i>   | cg15256539 | -0.006     | 0.020                | 0.191  | 0.048           |
| <i>BCKDHB</i>   | cg15256539 | -0.006     | 0.020                | 0.284  | 0.009           |
| <i>PPM1J</i>    | cg12687922 | -0.006     | 0.024                | 0.092  | 0.039           |
| <i>RET</i>      | cg05621401 | -0.008     | 0.014                | 0.155  | 0.035           |
| <i>LARGE</i>    | cg05670348 | -0.008     | 0.028                | 0.301  | 0.019           |
| <i>MEIS2</i>    | cg02917381 | -0.008     | 0.005                | 0.109  | 0.027           |
| <i>RBKS</i>     | cg06869899 | -0.009     | 0.017                | 0.176  | 0.036           |
| <i>MBD6</i>     | cg25107978 | -0.012     | 0.015                | 0.334  | 0.043           |

|                  |            |        |        |       |       |
|------------------|------------|--------|--------|-------|-------|
| <i>ERCC8</i>     | cg11649654 | -0.012 | 0.047  | 0.239 | 0.001 |
| <i>PPP1R3D</i>   | cg08966023 | -0.013 | 0.044  | 0.165 | 0.045 |
| <i>GOSR1</i>     | cg19098314 | -0.014 | 0.002  | 0.139 | 0.033 |
| <i>RFK</i>       | cg13789236 | -0.014 | 0.009  | 0.127 | 0.032 |
| <i>PLEKHA1</i>   | cg01246254 | -0.020 | <0.001 | 0.282 | 0.040 |
| <i>IRX3</i>      | cg24662961 | -0.020 | 0.003  | 0.774 | 0.021 |
| <i>DPH2</i>      | cg25955969 | -0.026 | 0.035  | 0.163 | 0.026 |
| <i>IGF2</i>      | cg02166532 | -0.027 | 0.008  | 0.132 | 0.024 |
| <i>LRPPRC</i>    | cg26538116 | -0.027 | 0.013  | 0.227 | 0.024 |
| <i>SNX16</i>     | cg06027949 | -0.034 | 0.011  | 0.435 | 0.032 |
| <i>FLJ44060</i>  | cg08489623 | -0.041 | 0.032  | 0.128 | 0.034 |
| <i>CRB3</i>      | cg03258472 | -0.046 | 0.026  | 0.173 | 0.033 |
| <i>BARHL2</i>    | cg17241310 | -0.046 | 0.036  | 0.255 | 0.004 |
| <i>C14orf105</i> | cg19903229 | -0.051 | 0.013  | 0.132 | 0.012 |
| <i>SNX4</i>      | cg16468910 | -0.054 | 0.022  | 0.212 | 0.015 |
| <i>HMP19</i>     | cg07884019 | -0.062 | 0.047  | 0.119 | 0.031 |
| <i>EDNRB</i>     | cg24745738 | -0.101 | 0.001  | 0.193 | 0.026 |

**Table S13. List of genes with correlation between alteration of DNA methylation and differential gene expression in SAT**

| Symbol        | Target ID  | Delta Beta | <i>p</i> value<br>(Delta Beta) | log FC | <i>p</i> value<br>(logFC) |
|---------------|------------|------------|--------------------------------|--------|---------------------------|
| <i>LEP</i>    | cg12782180 | 0.056      | 0.008                          | -0.352 | 0.022                     |
| <i>ZNF3</i>   | cg00929606 | 0.054      | 0.023                          | -0.142 | 0.001                     |
| <i>CAPSL</i>  | cg24202119 | 0.028      | 0.040                          | -0.166 | 0.006                     |
| <i>KCNQ1</i>  | cg17229197 | 0.026      | 0.019                          | -0.293 | <0.001                    |
| <i>KCNQ1</i>  | cg27491887 | 0.024      | 0.037                          | -0.293 | <0.001                    |
| <i>C1QC</i>   | cg11393848 | 0.023      | 0.029                          | -0.600 | 0.007                     |
| <i>CTSE</i>   | cg04457794 | 0.015      | 0.021                          | -0.232 | 0.018                     |
| <i>CLTA</i>   | cg26966384 | 0.015      | 0.035                          | -0.206 | 0.003                     |
| <i>CLTA</i>   | cg26966384 | 0.015      | 0.035                          | -0.174 | 0.027                     |
| <i>NIT1</i>   | cg10053203 | 0.015      | 0.010                          | -0.284 | 0.006                     |
| <i>ST7L</i>   | cg01183669 | 0.015      | 0.009                          | -0.145 | 0.031                     |
| <i>OPRM1</i>  | cg14262937 | 0.014      | 0.022                          | -0.129 | 0.013                     |
| <i>OPRM1</i>  | cg14262937 | 0.014      | 0.022                          | -0.198 | <0.001                    |
| <i>PTGER3</i> | cg12739034 | 0.012      | 0.009                          | -0.635 | 0.001                     |
| <i>DHFR</i>   | cg16161425 | 0.011      | 0.040                          | -0.170 | 0.047                     |

|                 |            |        |       |        |       |
|-----------------|------------|--------|-------|--------|-------|
| <i>PTPRO</i>    | cg27196745 | 0.008  | 0.043 | -0.447 | 0.011 |
| <i>POFUT1</i>   | cg25811820 | 0.006  | 0.016 | -0.078 | 0.048 |
| <i>ULBP1</i>    | cg25589890 | 0.006  | 0.041 | -0.173 | 0.015 |
| <i>SFRS3</i>    | cg08027745 | 0.005  | 0.044 | -0.406 | 0.017 |
| <i>TSC22D4</i>  | cg08487374 | 0.005  | 0.016 | -0.292 | 0.010 |
| <i>CCDC5</i>    | cg18307767 | 0.004  | 0.046 | -0.219 | 0.047 |
| <i>POP5</i>     | cg07236358 | 0.004  | 0.042 | -0.310 | 0.031 |
| <i>F5</i>       | cg09891761 | -0.004 | 0.032 | 0.559  | 0.007 |
| <i>DICER1</i>   | cg16184930 | -0.005 | 0.016 | 0.146  | 0.011 |
| <i>GUCY1A2</i>  | cg23984434 | -0.005 | 0.030 | 0.131  | 0.021 |
| <i>USP48</i>    | cg20956373 | -0.005 | 0.028 | 0.347  | 0.048 |
| <i>MLL5</i>     | cg05566397 | -0.006 | 0.045 | 0.542  | 0.008 |
| <i>AMPH</i>     | cg10293925 | -0.007 | 0.002 | 0.660  | 0.011 |
| <i>YWHAB</i>    | cg07064406 | -0.008 | 0.047 | 0.156  | 0.045 |
| <i>ZNF273</i>   | cg05306735 | -0.013 | 0.016 | 0.189  | 0.032 |
| <i>CUGBP2</i>   | cg15777781 | -0.015 | 0.014 | 0.338  | 0.014 |
| <i>LRRC39</i>   | cg26117431 | -0.015 | 0.009 | 0.129  | 0.005 |
| <i>TUB</i>      | cg15480475 | -0.015 | 0.019 | 0.427  | 0.041 |
| <i>TOMM34</i>   | cg11454415 | -0.017 | 0.014 | 0.325  | 0.017 |
| <i>DNM1L</i>    | cg27387222 | -0.017 | 0.017 | 0.327  | 0.025 |
| <i>CLN8</i>     | cg23833896 | -0.020 | 0.006 | 0.227  | 0.023 |
| <i>C1orf124</i> | cg15459773 | -0.021 | 0.046 | 0.183  | 0.005 |
| <i>C1orf124</i> | cg15459773 | -0.021 | 0.046 | 0.233  | 0.031 |
| <i>C11orf47</i> | cg18103150 | -0.021 | 0.012 | 0.211  | 0.031 |
| <i>PDE4D</i>    | cg05992340 | -0.022 | 0.008 | 0.405  | 0.033 |
| <i>SCT</i>      | cg05782292 | -0.025 | 0.048 | 0.075  | 0.038 |
| <i>TCAP</i>     | cg01680823 | -0.026 | 0.049 | 0.228  | 0.011 |
| <i>ADRA1D</i>   | cg09614401 | -0.030 | 0.039 | 0.102  | 0.017 |
| <i>BVES</i>     | cg20624391 | -0.034 | 0.023 | 0.073  | 0.045 |
| <i>NR2E3</i>    | cg18860847 | -0.034 | 0.038 | 0.098  | 0.016 |
| <i>SYNJ2</i>    | cg13645811 | -0.034 | 0.001 | 0.553  | 0.002 |
| <i>RIMS3</i>    | cg08394377 | -0.036 | 0.016 | 0.291  | 0.030 |
| <i>RUNX2</i>    | cg05996042 | -0.037 | 0.003 | 0.123  | 0.042 |
| <i>ADPRHL1</i>  | cg00463202 | -0.045 | 0.010 | 0.091  | 0.007 |
| <i>P4HA3</i>    | cg25599211 | -0.048 | 0.015 | 0.085  | 0.025 |
| <i>DST</i>      | cg04452713 | -0.051 | 0.003 | 0.319  | 0.024 |
| <i>MGAT4C</i>   | cg18344063 | -0.062 | 0.047 | 0.121  | 0.038 |



**Table S14. List of genes with correlation between alteration of DNA methylation and differential gene expression in VAT**

| <b>Symbol</b>   | <b>Target ID</b> | <b>Delta Beta</b> | <b>p value<br/>(Delta Beta)</b> | <b>log FC</b> | <b>p value<br/>(logFC)</b> |
|-----------------|------------------|-------------------|---------------------------------|---------------|----------------------------|
| <i>BRDT</i>     | cg14732540       | 0.086             | 0.008                           | -0.132        | 0.007                      |
| <i>PSG6</i>     | cg11151665       | 0.064             | <0.001                          | -0.125        | 0.029                      |
| <i>PPP2R2D</i>  | cg21750602       | 0.039             | 0.044                           | -0.196        | 0.029                      |
| <i>GPR175</i>   | cg13728650       | 0.031             | 0.006                           | -0.193        | 0.037                      |
| <i>KRT13</i>    | cg10742225       | 0.027             | 0.017                           | -0.132        | 0.015                      |
| <i>C21orf94</i> | cg17266238       | 0.025             | 0.032                           | -0.140        | 0.047                      |
| <i>PSG6</i>     | cg17642353       | 0.022             | 0.040                           | -0.125        | 0.029                      |
| <i>HBQ1</i>     | cg17714030       | 0.019             | 0.008                           | -0.570        | 0.001                      |
| <i>HBD</i>      | cg20609368       | 0.016             | 0.041                           | -1.443        | 0.001                      |
| <i>SLC7A6OS</i> | cg27077685       | 0.010             | 0.025                           | -0.283        | 0.024                      |
| <i>STEAP3</i>   | cg04749104       | 0.010             | 0.038                           | -0.176        | 0.010                      |
| <i>THSD1</i>    | cg16114640       | 0.009             | 0.013                           | -0.169        | 0.004                      |
| <i>PRMT2</i>    | cg06725035       | 0.008             | 0.018                           | -0.295        | 0.007                      |
| <i>ASAH1</i>    | cg13563405       | -0.004            | 0.048                           | 0.164         | 0.004                      |
| <i>TTC9C</i>    | cg24515202       | -0.004            | 0.027                           | 0.195         | 0.049                      |
| <i>APBA1</i>    | cg15840658       | -0.005            | 0.037                           | 0.138         | 0.037                      |
| <i>APBA1</i>    | cg15623573       | -0.005            | 0.048                           | 0.138         | 0.037                      |
| <i>BCKDHB</i>   | cg15256539       | -0.006            | 0.020                           | 0.191         | 0.048                      |
| <i>BCKDHB</i>   | cg15256539       | -0.006            | 0.020                           | 0.284         | 0.009                      |
| <i>PPM1J</i>    | cg12687922       | -0.006            | 0.024                           | 0.092         | 0.039                      |
| <i>RET</i>      | cg05621401       | -0.008            | 0.014                           | 0.155         | 0.035                      |
| <i>LARGE</i>    | cg05670348       | -0.008            | 0.028                           | 0.301         | 0.019                      |
| <i>MEIS2</i>    | cg02917381       | -0.008            | 0.005                           | 0.109         | 0.027                      |
| <i>RBKS</i>     | cg06869899       | -0.009            | 0.017                           | 0.176         | 0.036                      |
| <i>MBD6</i>     | cg25107978       | -0.012            | 0.015                           | 0.334         | 0.043                      |
| <i>ERCC8</i>    | cg11649654       | -0.012            | 0.047                           | 0.239         | 0.001                      |
| <i>PPP1R3D</i>  | cg08966023       | -0.013            | 0.044                           | 0.165         | 0.045                      |
| <i>GOSR1</i>    | cg19098314       | -0.014            | 0.002                           | 0.139         | 0.033                      |
| <i>RFK</i>      | cg13789236       | -0.014            | 0.009                           | 0.127         | 0.032                      |
| <i>PLEKHA1</i>  | cg01246254       | -0.020            | <0.001                          | 0.282         | 0.040                      |
| <i>IRX3</i>     | cg24662961       | -0.020            | 0.003                           | 0.774         | 0.021                      |
| <i>DPH2</i>     | cg25955969       | -0.026            | 0.035                           | 0.163         | 0.026                      |
| <i>IGF2</i>     | cg02166532       | -0.027            | 0.008                           | 0.132         | 0.024                      |
| <i>LRPPRC</i>   | cg26538116       | -0.027            | 0.013                           | 0.227         | 0.024                      |
| <i>SNX16</i>    | cg06027949       | -0.034            | 0.011                           | 0.435         | 0.032                      |

|                  |            |        |       |       |       |
|------------------|------------|--------|-------|-------|-------|
| <i>FLJ44060</i>  | cg08489623 | -0.041 | 0.032 | 0.128 | 0.034 |
| <i>CRB3</i>      | cg03258472 | -0.046 | 0.026 | 0.173 | 0.033 |
| <i>BARHL2</i>    | cg17241310 | -0.046 | 0.036 | 0.255 | 0.004 |
| <i>C14orf105</i> | cg19903229 | -0.051 | 0.013 | 0.132 | 0.012 |
| <i>SNX4</i>      | cg16468910 | -0.054 | 0.022 | 0.212 | 0.015 |
| <i>HMP19</i>     | cg07884019 | -0.062 | 0.047 | 0.119 | 0.031 |
| <i>EDNRB</i>     | cg24745738 | -0.101 | 0.001 | 0.193 | 0.026 |

**Table S15. List of genes with correlation between alteration of DNA methylation and differential gene expression in LT**

| Symbol          | Target ID  | Delta Beta | <i>p</i> value<br>(Delta Beta) | log FC | <i>p</i> value<br>(logFC) |
|-----------------|------------|------------|--------------------------------|--------|---------------------------|
| <i>SLC12A8</i>  | cg14391622 | 0.049      | 0.021                          | -0.353 | 0.034                     |
| <i>CACNB4</i>   | cg18272264 | 0.042      | 0.011                          | -0.152 | 0.033                     |
| <i>FAM3B</i>    | cg03158400 | 0.040      | 0.040                          | -0.128 | 0.037                     |
| <i>SYK</i>      | cg10025443 | 0.038      | 0.022                          | -0.133 | 0.047                     |
| <i>CTBS</i>     | cg08380539 | 0.004      | 0.046                          | -0.263 | 0.020                     |
| <i>MARCH8</i>   | cg02702510 | -0.011     | 0.027                          | 0.070  | 0.041                     |
| <i>SON</i>      | cg26265060 | -0.027     | 0.050                          | 0.064  | 0.050                     |
| <i>KCNJ1</i>    | cg14481339 | -0.033     | 0.022                          | 0.096  | 0.034                     |
| <i>TMEM92</i>   | cg25949363 | -0.035     | 0.038                          | 0.116  | 0.031                     |
| <i>PLA2G2A</i>  | cg11037787 | -0.042     | 0.025                          | 1.179  | 0.026                     |
| <i>NRG4</i>     | cg13044277 | -0.043     | 0.028                          | 0.236  | 0.036                     |
| <i>PNLIPRP1</i> | cg27600794 | -0.044     | 0.021                          | 0.110  | 0.014                     |
| <i>SYT7</i>     | cg02104644 | -0.051     | 0.046                          | 0.138  | 0.033                     |
| <i>LTBR</i>     | cg15784615 | -0.052     | 0.013                          | 0.250  | 0.028                     |
| <i>CATSPER2</i> | cg23685580 | -0.052     | 0.027                          | 0.078  | 0.032                     |
| <i>LPAL2</i>    | cg15398520 | -0.058     | 0.027                          | 0.107  | 0.010                     |
| <i>NCALD</i>    | cg01484156 | -0.059     | <0.001                         | 0.266  | 0.013                     |
| <i>ZDHHC11</i>  | cg20584011 | -0.059     | 0.002                          | 0.763  | 0.007                     |
| <i>LGTN</i>     | cg16639185 | -0.060     | 0.031                          | 0.241  | 0.031                     |
| <i>ZDHHC11</i>  | cg18429742 | -0.078     | 0.016                          | 0.763  | 0.007                     |
| <i>OXT</i>      | cg26955850 | -0.080     | 0.050                          | 0.802  | 0.037                     |
| <i>PRSS21</i>   | cg22730830 | -0.113     | 0.003                          | 0.132  | 0.012                     |
| <i>OXT</i>      | cg26267561 | -0.154     | 0.001                          | 0.802  | 0.037                     |

**Table S16. Gene ontology enrichment analysis using the genes with correlation between alteration of DNA methylation and differential gene expression**

| <b>Tissue</b> | <b>Term</b>                                                                 | <b>Count</b> | <b>p value</b> | <b>Genes</b>                                                       |
|---------------|-----------------------------------------------------------------------------|--------------|----------------|--------------------------------------------------------------------|
| <b>WB</b>     | GO:0042981~regulation of apoptosis                                          | 9            | 0.011          | <i>MSH6, CASP9, SNCB, DEDD, PLEKHG5, HSPA5, IGFBP3, CLN8, GCH1</i> |
|               | GO:0043067~regulation of programmed cell death                              | 9            | 0.012          | <i>MSH6, CASP9, SNCB, DEDD, PLEKHG5, HSPA5, IGFBP3, CLN8, GCH1</i> |
|               | GO:0010941~regulation of cell death                                         | 9            | 0.012          | <i>MSH6, CASP9, SNCB, DEDD, PLEKHG5, HSPA5, IGFBP3, CLN8, GCH1</i> |
|               | GO:0009416~response to light stimulus                                       | 4            | 0.016          | <i>MSH6, CASP9, NR2E3, SCARA3</i>                                  |
|               | GO:0009411~response to UV                                                   | 3            | 0.022          | <i>MSH6, CASP9, SCARA3</i>                                         |
|               | GO:0043065~positive regulation of apoptosis                                 | 6            | 0.024          | <i>MSH6, CASP9, DEDD, PLEKHG5, IGFBP3, GCH1</i>                    |
|               | GO:0043068~positive regulation of programmed cell death                     | 6            | 0.025          | <i>MSH6, CASP9, DEDD, PLEKHG5, IGFBP3, GCH1</i>                    |
|               | GO:0006979~response to oxidative stress                                     | 4            | 0.025          | <i>UCP2, TXNRD2, SCARA3, CLN8</i>                                  |
|               | GO:0010942~positive regulation of cell death                                | 6            | 0.025          | <i>MSH6, CASP9, DEDD, PLEKHG5, IGFBP3, GCH1</i>                    |
|               | GO:0050884~neuromuscular process controlling posture                        | 2            | 0.034          | <i>CLN8, GCH1</i>                                                  |
|               | GO:0045773~positive regulation of axon extension                            | 2            | 0.034          | <i>LIMK1, MAPT</i>                                                 |
|               | GO:0009314~response to radiation                                            | 4            | 0.041          | <i>MSH6, CASP9, NR2E3, SCARA3</i>                                  |
|               | GO:0000305~response to oxygen radical                                       | 2            | 0.041          | <i>UCP2, TXNRD2</i>                                                |
| <b>SAT</b>    | GO:0007005~mitochondrion organization                                       | 4            | 0.007          | <i>DNM1L, SYNJ2, CLN8, TOMM34</i>                                  |
|               | GO:0008015~blood circulation                                                | 4            | 0.015          | <i>F5, TCAP, KCNQ1, ADRA1D</i>                                     |
|               | GO:0003013~circulatory system process                                       | 4            | 0.015          | <i>F5, TCAP, KCNQ1, ADRA1D</i>                                     |
|               | GO:0040029~regulation of gene expression, epigenetic                        | 3            | 0.020          | <i>MLL5, DICER1, KCNQ1</i>                                         |
|               | GO:0007188~G-protein signaling, coupled to cAMP nucleotide second messenger | 3            | 0.024          | <i>OPRM1, PTGER3, ADRA1D</i>                                       |
|               | GO:0019933~cAMP-mediated signaling                                          | 3            | 0.029          | <i>OPRM1, PTGER3, ADRA1D</i>                                       |

|            |                                                                               |   |       |                                         |
|------------|-------------------------------------------------------------------------------|---|-------|-----------------------------------------|
|            | GO:0007187~G-protein signaling, coupled to cyclic nucleotide second messenger | 3 | 0.041 | <i>OPRM1, PTGER3, ADRA1D</i>            |
| <b>VAT</b> | GO:0007497~posterior midgut development                                       | 2 | 0.004 | <i>EDNRB, RET</i>                       |
|            | GO:0048484~enteric nervous system development                                 | 2 | 0.020 | <i>EDNRB, RET</i>                       |
|            | GO:0015671~oxygen transport                                                   | 2 | 0.027 | <i>HBQ1, HBD</i>                        |
| <b>LT</b>  | GO:0046903~secretion                                                          | 5 | 0.000 | <i>OXT, FAM3B, CACNB4, SYK, KCNJ1</i>   |
|            | GO:0003001~generation of a signal involved in cell-cell signaling             | 3 | 0.004 | <i>FAM3B, CACNB4, SYK</i>               |
|            | GO:0030001~metal ion transport                                                | 4 | 0.016 | <i>SLC12A8, CATSPER2, CACNB4, KCNJ1</i> |
|            | GO:0006812~cation transport                                                   | 4 | 0.026 | <i>SLC12A8, CATSPER2, CACNB4, KCNJ1</i> |
|            | GO:0048584~positive regulation of response to stimulus                        | 3 | 0.031 | <i>PLA2G2A, CACNB4, SYK</i>             |
|            | GO:0007267~cell-cell signaling                                                | 4 | 0.032 | <i>OXT, FAM3B, CACNB4, SYK</i>          |
|            | GO:0050851~antigen receptor-mediated signaling pathway                        | 2 | 0.038 | <i>CACNB4, SYK</i>                      |
|            | GO:0051094~positive regulation of developmental process                       | 3 | 0.042 | <i>OXT, PLA2G2A, SYK</i>                |
|            | GO:0002429~immune response-activating cell surface receptor signaling pathway | 2 | 0.045 | <i>CACNB4, SYK</i>                      |
